# Supplementary material for: Adipocyte associated glucocorticoid signaling regulates normal fibroblast function which is lost in inflammatory arthritis
Source: PubMed Central journal article supplement — Nat Commun. 2024 Nov 14;15:9859. doi: 10.1038/s41467-024-52586-x (PMC11564742; doi:10.1038/s41467-024-52586-x), 2024-11-14
Supplement: 41467_2024_52586_MOESM1_ESM.pdf [file 41467_2024_52586_MOESM1_ESM.pdf]

**Supplementary Table 1. Healthy Synovial Donor Information.**

| <b>Cohort 1:</b> |            |            |                                         |                        |                                   |                                  |                                                      |
|------------------|------------|------------|-----------------------------------------|------------------------|-----------------------------------|----------------------------------|------------------------------------------------------|
| <b>Donor</b>     | <b>Sex</b> | <b>Age</b> | <b>BMI</b>                              | <b>Weight category</b> | <b>Collins Grade of cartilage</b> | <b>Time to tissue collection</b> | <b>Glucocorticoid usage</b><br>NR= none reported     |
| 1                | Male       | 51         | Average: 26.9, standard deviation: 4.7  | Overweight             | N/A                               | 15.8hrs                          | Home: NR Hospital: NR                                |
| 2                | Male       | 28         |                                         | Lean                   | N/A                               | 14.8hrs                          | Home: NR Hospital: NR                                |
| 3                | Male       | 29         |                                         | Overweight             | N/A                               | 3hrs                             | Home: NR Hospital: NR                                |
| 4                | Female     | 41         |                                         | Overweight             | N/A                               | 7.7hrs                           | Home: NR Hospital: NR                                |
| 5                | Male       | 54         |                                         | Lean                   | N/A                               | 12.5hrs                          | Home: NR Hospital: NR                                |
| 6                | Male       | 59         |                                         | Obese                  | N/A                               | N/A                              | Home: NR Hospital: NR                                |
| 7                | Female     | 56         |                                         | Obese                  | 1                                 | N/A                              | Home: NR Hospital: NR                                |
| 8                | Female     | 58         |                                         | Lean                   | 2                                 | N/A                              | Home: NR Hospital: NR                                |
| 9                | Female     | 50         |                                         | Obese                  | 0                                 | N/A                              | Home: NR Hospital: NR                                |
| 10               | Female     | 65         |                                         | Lean                   | 1                                 | N/A                              | Home: NR Hospital: NR                                |
| <b>Cohort 2:</b> |            |            |                                         |                        |                                   |                                  |                                                      |
| 11               | Female     | 60         | Average: 28.5, standard deviation: 8.6. | Obese                  | N/A                               | 12 hrs                           | Home: prednisone; hospital: NR                       |
| 12               | Female     | 69         |                                         | Lean                   | N/A                               | 17hrs                            | Home: NR; Hospital: Prednisone                       |
| 13               | Male       | 72         |                                         | Lean                   | N/A                               | 21hrs                            | Home: budesonide, prednisone; Hospital: Prednisone   |
| 14               | Male       | 67         |                                         | Obese                  | N/A                               | 24hrs                            | Home: NR; Hospital: Hydrocortisone injection         |
| 15               | Female     | 60         |                                         | Overweight             | N/A                               | N/A                              | Home: prednisone, Hospital; Hydrocortisone injection |
| 16               | Male       | 41         |                                         | Lean                   | N/A                               | 6hrs                             | Home: NR Hospital; Methylprednisolone                |

**Supplementary Table 2.** Adipose donor Information. *\*Note that MUO = metabolically unhealthy. When less than 3 MUO events are logged the patient is considered metabolically healthy obese “MHO” based on bloodwork and clinical manifestations (red highlight).*

| Patient | Sex | Age | Weight (kg)                          | BMI                                 | Weight category | Group | MUO *<br>Events<br>≥3 =<br>MUO | Blood Glucose (fasted)              | Fasted Triglycerides                | HDL Chol.                           | Co-morbidities: (Red Highlight = MUO Event) |
|---------|-----|-----|--------------------------------------|-------------------------------------|-----------------|-------|--------------------------------|-------------------------------------|-------------------------------------|-------------------------------------|---------------------------------------------|
| P11     | M   | 40  | Average:<br>164.8<br>St dev:<br>39.3 | Average:<br>56.56<br>St dev:<br>9.3 | Obese           | MHO   | 0                              | Average:<br>5.04<br>St dev:<br>0.49 | Average:<br>1.28<br>St dev:<br>0.24 | Average:<br>1.23<br>St dev:<br>0.26 | 1 patient had an MUO (hypertension)         |
| P10     | M   | 50  |                                      |                                     | Obese           | MHO   | 1                              |                                     |                                     |                                     |                                             |
| P49     | F   | 57  |                                      |                                     | Obese           | MHO   | 0                              |                                     |                                     |                                     |                                             |
| P08     | F   | 32  |                                      |                                     | Obese           | MHO   | 0                              |                                     |                                     |                                     |                                             |
| P50     | F   | 37  |                                      |                                     | Obese           | MHO   | 1                              |                                     |                                     |                                     |                                             |

**Supplementary Table 3.** Statistical information, p-values.

| Figure Number: | p-values:                                                                                                                                                                                                                                                                                                                                                                                                                                                                                                                                                                                                                              |
|----------------|----------------------------------------------------------------------------------------------------------------------------------------------------------------------------------------------------------------------------------------------------------------------------------------------------------------------------------------------------------------------------------------------------------------------------------------------------------------------------------------------------------------------------------------------------------------------------------------------------------------------------------------|
| 2e             | <i>APOD</i> + cluster: Healthy vs OA p<0.0001, Healthy vs RA p<0.0001, Healthy vs REM p=0.2637. <i>PLIN2</i> + cluster: Healthy vs OA p<0.0001, Healthy vs RA p<0.0001, Healthy v REM p=0.0717. <i>CXCL12</i> + cluster: F=6.769, Healthy vs OA p= 0.0056, Healthy vs RA p=0.003, Healthy vs REM p=0.5072.                                                                                                                                                                                                                                                                                                                             |
| 3a             | <i>APOD</i> : p=0.0002, <i>NNMT</i> : p<0.0001, <i>CEBPD</i> : p=0.0026                                                                                                                                                                                                                                                                                                                                                                                                                                                                                                                                                                |
| 3b             | <i>APOD</i> : p=0.0046, <i>NNMT</i> : p=0.0116, <i>CEBPD</i> : p=0.0066                                                                                                                                                                                                                                                                                                                                                                                                                                                                                                                                                                |
| 3c             | <i>APOD</i> : Ctl vs. ACM P<0.0001, Ctl vs. Organic p=0.032, Ctl vs. Inter- phase p=0.7546, Ctl vs. Aqueous p=0.8512; <i>NNMT</i> : Ctl vs. ACM p<0.0001, Ctl vs. Organic p=0.0039, Ctl vs. Inter- phase p=0.8746, Ctl vs. Aqueous p= 0.0487; <i>CEBPD</i> : Ctl vs. ACM p=0.0088, Ctl vs. Organic p=0.4583, Ctl vs. Inter- phase p=0.9967, Ctl vs. Aqueous p=0.1838.                                                                                                                                                                                                                                                                  |
| 3d             | <i>APOD</i> : Ctl vs. ACM p=0.2206, Ctl vs. CHCL3 p=0.9868, Ctl vs. Acetone p=0.0085, Ctl vs. Methanol p=0.7568, Ctl vs. H2O p=0.9805; <i>NNMT</i> : Ctl vs. ACM p=0.7741, Ctl vs. CHCL3 p=0.9607, Ctl vs. Acetone p=0.0034, Ctl vs. Methanol p=0.9996, Ctl vs. H2O p=0.9997; <i>CEBPD</i> : Ctl vs. ACM p=0.0101, Ctl vs. CHCL3 p=0.9792, Ctl vs. Acetone p=0.0014, Ctl vs. Methanol p=0.9997, Ctl vs. H2O p=0.9921.                                                                                                                                                                                                                  |
| 4a             | <i>APOD</i> : Basal vs. Differentiation media p=0.0002, Basal vs. ACM p<0.0001, Basal vs. - Dexamethasone p=0.9778, Basal vs. -Indomethacin p=0.0204, Basal vs. -Insulin p=0.0367, Basal vs. -IBMX p=0.0283; <i>NNMT</i> : Basal vs. Differentiation media p=0.1722, Basal vs. ACM p=0.0013, Basal vs. -Dexamethasone p=0.9997, Basal vs. -Indomethacin p=0.3975, Basal vs. -Insulin p=0.2896, Basal vs. -IBMX p=0.9999; <i>CEBPD</i> : Basal vs. Differentiation media p=0.5578, Basal vs. ACM p=0.0015, Basal vs. -Dexamethasone p=0.7883, Basal vs. - Indomethacin p=0.2181, Basal vs. -Insulin p=0.0367, Basal vs. -IBMX p=0.9975. |
| 4c             | <i>APOD</i> : Basal vs. FCM p<0.0001, Basal vs. Organic p=0.0038, Basal vs. Chlor p>0.9999, Basal vs. Acet p=0.5766, Basal vs. Meth p=0.698, Basal vs. H2O p=0.9985; <i>NNMT</i> : Basal vs. FCM p=0.0099, Basal vs. Organic p=0.01, Basal vs. Chlor p=0.5769, Basal vs. Acet p=0.0468, Basal vs. Meth p=0.1506, Basal vs. H2O p=0.9961; <i>CEBPD</i> : Basal vs. FCM p=0.23, Basal vs. Organic p=0.0029, Basal vs. Chlor p=0.9881, Basal vs. Acet p=0.1802, Basal vs. Meth p=0.8879, Basal vs. H2O p=0.9997.                                                                                                                          |
| 4f             | <i>APOD</i> : p=0.0089; <i>NNMT</i> : p=0.0335; <i>CEBPD</i> : p=0.0007.                                                                                                                                                                                                                                                                                                                                                                                                                                                                                                                                                               |
| 4g             | <i>APOD</i> : NTC vs. NTC+ FCM p<0.0001, GCR KO vs. GCR KO+ FCM p=0.0012, NTC vs. GCR KO p=0.996, NTC+ FCM vs. GCR KO+ FCM p<0.0001; <i>NNMT</i> : NTC vs. NTC+ FCM p<0.0001, GCR KO vs. GCR KO+ FCM p=0.9961, NTC vs. GCR KO p<0.0001, NTC+ FCM vs. GCR KO+ FCM p=0.0139; <i>CEBPD</i> : NTC vs. NTC+ FCM p<0.0001, GCR KO vs. GCR KO+ FCM p>0.9999, NTC vs. GCR KO p<0.0001, NTC+ FCM vs. GCR KO+ FCM p<0.0001.                                                                                                                                                                                                                      |
| 4i             | Cortisol score: Healthy vs OA p= 0.0026, Healthy vs RA p<0.0001, Healthy vs REM p>0.9999, OA vs RA p>0.9999, OA vs REM p>0.9999, RA vs REM p= 0.5001. FCM score: Healthy vs OA p= 0.0576, Healthy vs RA p<0.0001, Healthy vs REM p= 0.0769, OA vs RA p>0.9999, OA vs REM p>0.9999, RA vs REM p>0.9999. FCM+ GCR ant score: Healthy vs OA p>0.9999, Healthy vs RA p= 0.0024, Healthy vs REM p= 0.4651, OA vs RA p= 0.0740, OA vs REM p>0.9999, RA vs REM p>0.9999.                                                                                                                                                                      |
| 5a             | p= 0.0015.                                                                                                                                                                                                                                                                                                                                                                                                                                                                                                                                                                                                                             |
| 5b             | <i>Adipoq</i> : p= 0.0088, <i>Hsd11b1</i> : p= 0.0220, <i>Pparg</i> : p= 0.0546, <i>Cebpd</i> : p= 0.0559, <i>Plin2</i> : p= 0.0187, <i>Cidec</i> : p= 0.0442.                                                                                                                                                                                                                                                                                                                                                                                                                                                                         |

|    |                                                                                                                                                                                                                                                                                                                                                                                                                                                                                                                                                                                                                                                                                                                                                                                                                                                                                                                                                                               |
|----|-------------------------------------------------------------------------------------------------------------------------------------------------------------------------------------------------------------------------------------------------------------------------------------------------------------------------------------------------------------------------------------------------------------------------------------------------------------------------------------------------------------------------------------------------------------------------------------------------------------------------------------------------------------------------------------------------------------------------------------------------------------------------------------------------------------------------------------------------------------------------------------------------------------------------------------------------------------------------------|
| 5c | <i>Nr3c1</i> : p=0.0481, <i>Apod</i> : p=0.0416, <i>Cebpd</i> : p=0.0042, <i>Mt1</i> : p=0.0136.                                                                                                                                                                                                                                                                                                                                                                                                                                                                                                                                                                                                                                                                                                                                                                                                                                                                              |
| 5d | p=0.0082.                                                                                                                                                                                                                                                                                                                                                                                                                                                                                                                                                                                                                                                                                                                                                                                                                                                                                                                                                                     |
| 5e | AUC knees: GT ctl PBS vs GT ctl mBSA p<0.0001, <i>Pdgfra</i> -CreER; <i>Nr3c1</i> fl/fl PBS vs <i>Pdgfra</i> -CreER; <i>Nr3c1</i> fl/fl mBSA p<0.0001, GT ctl PBS vs <i>Pdgfra</i> -CreER; <i>Nr3c1</i> fl/fl PBS p=0.9738, GT ctl mBSA vs <i>Pdgfra</i> -CreER; <i>Nr3c1</i> fl/fl mBSA p=0.0063.                                                                                                                                                                                                                                                                                                                                                                                                                                                                                                                                                                                                                                                                            |
| 5f | CD45+ cells: GT ctl PBS vs GT ctl mBSA p=0.0048, <i>Pdgfra</i> -CreER; <i>Nr3c1</i> fl/fl PBS vs <i>Pdgfra</i> -CreER; <i>Nr3c1</i> fl/fl mBSA p<0.0001, GT ctl PBS vs <i>Pdgfra</i> -CreER; <i>Nr3c1</i> fl/fl PBS p=0.9519, GT ctl mBSA vs <i>Pdgfra</i> -CreER; <i>Nr3c1</i> fl/fl mBSA p=0.0020. CD4+ T cells: GT ctl PBS vs GT ctl mBSA p=0.0082, <i>Pdgfra</i> -CreER; <i>Nr3c1</i> fl/fl PBS vs <i>Pdgfra</i> -CreER; <i>Nr3c1</i> fl/fl mBSA p<0.0001, GT ctl PBS vs <i>Pdgfra</i> -CreER; <i>Nr3c1</i> fl/fl PBS p=0.9467, GT ctl mBSA vs <i>Pdgfra</i> -CreER; <i>Nr3c1</i> fl/fl mBSA p=0.0182.                                                                                                                                                                                                                                                                                                                                                                    |
| 6b | Cortisol score p-values: DDP4 vs CEBPD: p= 0.0009, DDP4 vs FABP4: p= 0.0024, DDP4 vs PPARG: p= 0.3089, CEBPD vs FABP4: p= >0.9999, CEBPD vs PPARG: p= 0.5819, FABP4 vs PPARG: p= 0.9508. FCM score p values: DDP4 vs CEBPD: p<0.0001, DDP4 vs FABP4: p= 0.0723, DDP4 vs PPARG: p= 0.4833, CEBPD vs FABP4: p= 0.1577, CEBPD vs PPARG: p= 0.0361, FABP4 vs PPARG: p>0.9999. FCM+ GCR antagonist score p-values: DDP4 vs CEBPD: p= 0.0006, DDP4 vs FABP4: p> 0.9999, DDP4 vs PPARG: p> 0.9999, CEBPD vs FABP4: p= 0.0295, CEBPD vs PPARG: p= 0.0085, FABP4 vs PPARG: p>0.9999. TGFB score p-values: DDP4 vs CEBPD: p> 0.9999, DDP4 vs FABP4: p= 0.0031, DDP4 vs PPARG: p= 0.1774, CEBPD vs FABP4: p= 0.0111, CEBPD vs PPARG: p= 0.3978, FABP4 vs PPARG: p> 0.9999.                                                                                                                                                                                                               |
| 6c | <i>DPP4</i> + progenitors: Healthy vs OA p-value= 0.6917, Healthy vs RA p-value= 0.3918, Healthy vs REM p-value= 0.4229, OA vs RA p-value= 0.9953, OA vs REM p-value= 0.1190, RA vs REM p-value= 0.0543, <i>CEBPD</i> + PreAd: Healthy vs OA p-value= 0.844, Healthy vs RA p-value= 0.1273, Healthy vs REM p-value= 0.8367, OA vs RA p-value= 0.6353, OA vs REM p-value= 0.5112, RA vs REM p-value= 0.1195, <i>FABP4</i> + PreAd: Healthy vs OA p-value= 0.1307, Healthy vs RA p-value= 0.2790, Healthy vs REM p-value= 0.1033, OA vs RA p-value= 0.8106, OA vs REM p-value= 0.0021, RA vs REM p-value= 0.0039, <i>VIT</i> +Areg: Healthy vs OA p-value= 0.9493, Healthy vs RA p-value= 0.0621, Healthy vs REM p-value= 0.9136, OA vs RA p-value= 0.2663, OA vs REM p-value= 0.9926, RA vs REM p-value= 0.8179.                                                                                                                                                               |
| 7a | Basal vs TNF p-value= 0.0208, Basal vs TNF+FCM p-value= 0.9796, Basal vs TNF+cortisol p-value= 0.9999, TNF vs TNF+FCM p-value= 0.0353, TNF vs TNF+cortisol p-value= 0.0228, TNF+FCM vs TNF+cortisol p-value= 0.9882.                                                                                                                                                                                                                                                                                                                                                                                                                                                                                                                                                                                                                                                                                                                                                          |
| 7b | FLS vs TGFB p-value= 0.0149, FLS vs TGFB+cortisol p-value= 0.9630, TGFB vs TGFB+cortisol p-value= 0.0030.                                                                                                                                                                                                                                                                                                                                                                                                                                                                                                                                                                                                                                                                                                                                                                                                                                                                     |
| 7c | <i>APOD</i> : Cortisol vs Basal p< 0.0001, Cortisol vs Cortisol+TNFa p= 0.0086, Cortisol vs Cortisol +TGFB p<0.0001, Cortisol vs Cortisol+IL17 p= 0.9875, Cortisol vs Cortisol+ IL1B p= 0.9863, Cortisol vs Cortisol+IFNy p<0.0001, Cortisol vs Cortisol +TNFa+IFNy p<0.0001, Cortisol vs Cortisol+TNFa+IL17 p<0.0001; <i>CEBPD</i> : Cortisol vs Basal p< 0.0001, Cortisol vs Cortisol+TNFa p>0.9999, Cortisol vs Cortisol +TGFB p< 0.0001, Cortisol vs Cortisol+IL17 p= 0.0183, Cortisol vs Cortisol+ IL1B p= 0.9834, Cortisol vs Cortisol+IFNy p= 0.9920, Cortisol vs Cortisol +TNFa+IFNy p= 0.3960, Cortisol vs Cortisol+TNFa+IL17 p= 0.9994; <i>PLIN2</i> : Cortisol vs Basal p= 0.0091, Cortisol vs Cortisol+TNFa p= 0.0771, Cortisol vs Cortisol +TGFB p< 0.0001, Cortisol vs Cortisol+IL17 p= 0.0445, Cortisol vs Cortisol+ IL1B p= 0.0035, Cortisol vs Cortisol+IFNy p< 0.0001, Cortisol vs Cortisol +TNFa+IFNy p< 0.0001, Cortisol vs Cortisol+TNFa+IL17 p= 0.3853. |

|    |                                                                                                                                                                                                                                                                                                                                                                                                                                                                                                                                                                                                                                                                                                                                                                                                                                                                                                                                                                                                                                                                                                                                                                                |
|----|--------------------------------------------------------------------------------------------------------------------------------------------------------------------------------------------------------------------------------------------------------------------------------------------------------------------------------------------------------------------------------------------------------------------------------------------------------------------------------------------------------------------------------------------------------------------------------------------------------------------------------------------------------------------------------------------------------------------------------------------------------------------------------------------------------------------------------------------------------------------------------------------------------------------------------------------------------------------------------------------------------------------------------------------------------------------------------------------------------------------------------------------------------------------------------|
| 7d | <p><i>ADIPOQ</i>: Basal vs GCR ant <math>p &gt; 0.9999</math>, Basal vs ADM <math>p = 0.0124</math>, Basal vs ADM+GCR ant <math>p &gt; 0.9999</math>, GCR ant vs ADM <math>p = 0.0124</math>, GCR ant vs ADM+ GCR ant <math>p &gt; 0.9999</math>, ADM vs ADM+ GCR ant <math>p = 0.0124</math>; <i>FABP4</i>: Basal vs GCR ant <math>p &gt; 0.9999</math>, Basal vs ADM <math>p &lt; 0.0001</math>, Basal vs ADM+GCR ant <math>p &gt; 0.9999</math>, GCR ant vs ADM <math>p &lt; 0.0001</math>, GCR ant vs ADM+ GCR ant <math>p &gt; 0.9999</math>, ADM vs ADM+ GCR ant <math>p &lt; 0.0001</math>, <i>LEPTIN</i>: Basal vs GCR ant <math>p = 0.9987</math>, Basal vs ADM <math>p = 0.0034</math>, Basal vs ADM+GCR ant <math>p = 0.5026</math>, GCR ant vs ADM <math>p = 0.0040</math>, GCR ant vs ADM+ GCR ant <math>p = 0.5830</math>, ADM vs ADM+ GCR ant <math>p = 0.0216</math>; <i>PPARG</i>: Basal vs GCR ant <math>p = 0.9187</math>, Basal vs ADM <math>p = 0.0001</math>, Basal vs ADM+GCR ant <math>p &gt; 0.9999</math>, GCR ant vs ADM <math>p = 0.0002</math>, GCR ant vs ADM+ GCR ant <math>p = 0.9095</math>, ADM vs ADM+ GCR ant <math>p = 0.0001</math>.</p> |
| 7e | <p>FLS+ADM vs FLS <math>p &lt; 0.0001</math>, FLS+ADM vs FLS+ADM+TGF-B1 <math>p &lt; 0.0001</math>, FLS+ADM vs FLS+ADM+TNF+IFN-<math>\gamma</math> <math>p = 0.0088</math>.</p>                                                                                                                                                                                                                                                                                                                                                                                                                                                                                                                                                                                                                                                                                                                                                                                                                                                                                                                                                                                                |

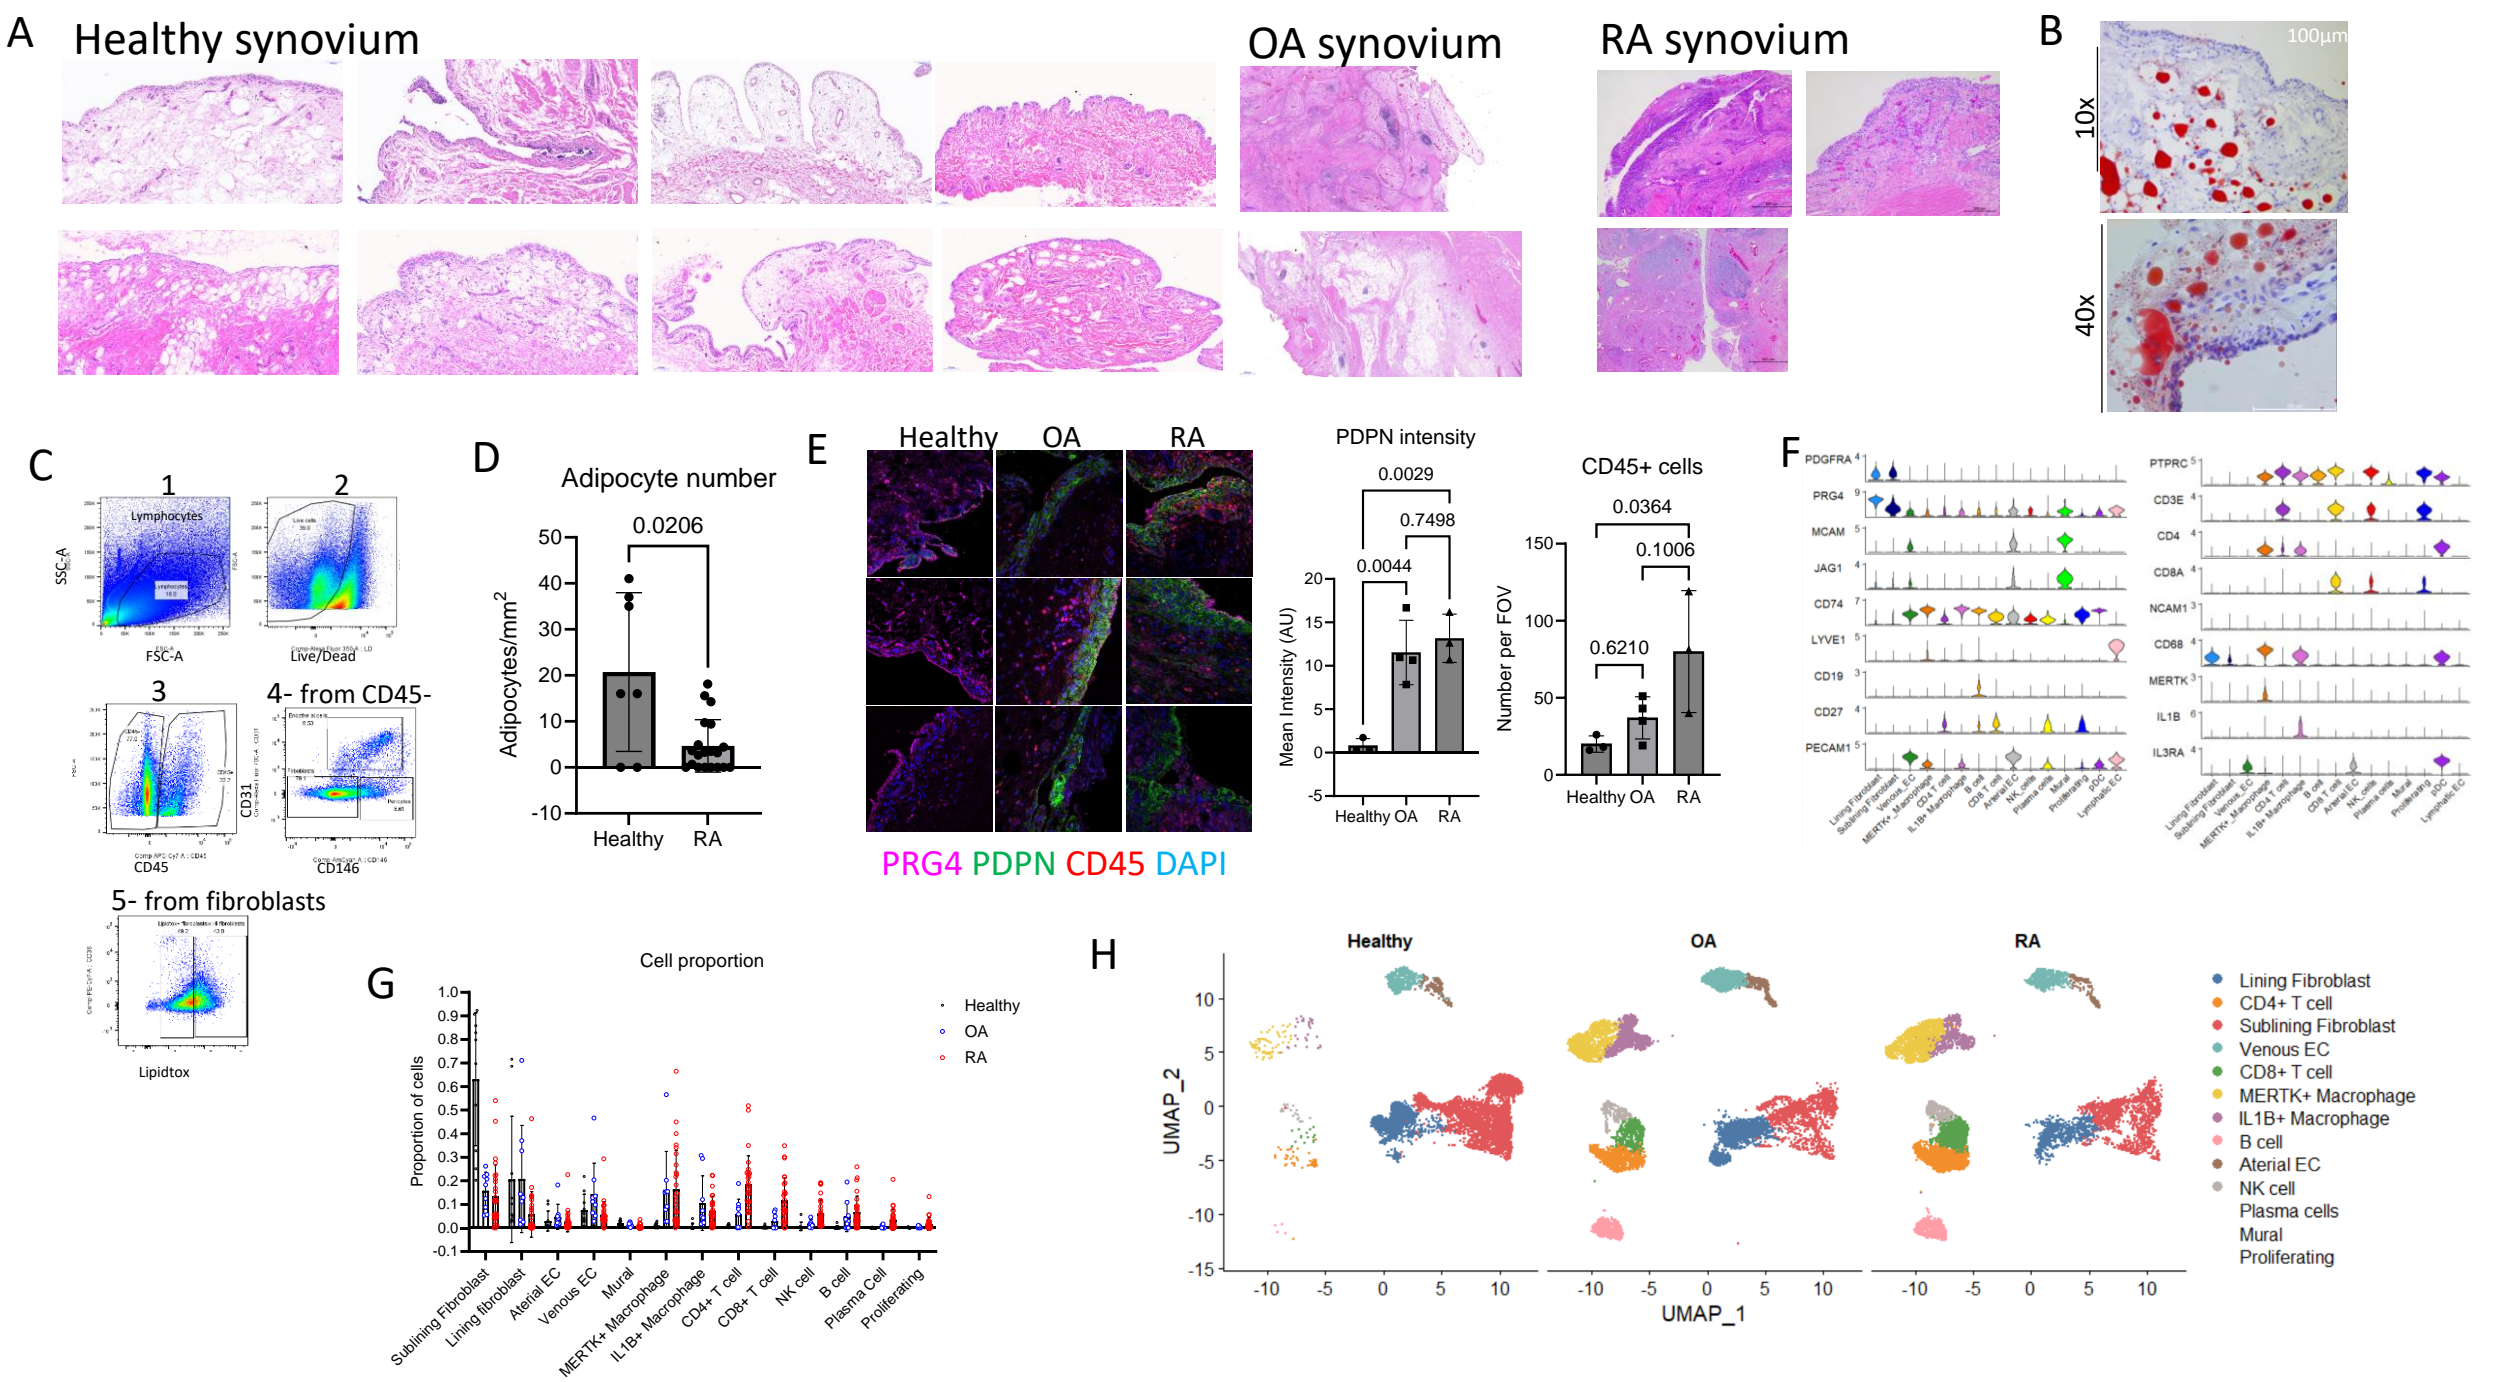

Supplementary Figure 1. A. H&E staining on paraffin embedded healthy synovial tissue sections. n=8 biological samples. B. Oil red O staining of OCT embedded healthy synovium. C. Gating strategy used to quantify fibroblasts in Figure 1b. D. Adipocyte quantification. Adipocytes were identified by morphology on H&E images of healthy and RA synovium from AMP phase 2 biopsies, healthy n=7, RA n=20. P values were calculated using a two-tailed student's T test. E. Images used for quantification in Figure 1c, n=3 biological replicates representative of one independent experiment. P values were calculated using an ordinary one-way ANOVA followed by Tukey's multiple comparison post-hoc testing. F. Major marker expression defining each cluster. G. Cell cluster proportions among healthy, OA, and naïve RA synovial cells and UMAP separated by disease state. Healthy n=10, OA n=9, RA n=28 biological samples. H. UMAP in figure 1d split by disease state. Source data are provided as a Source Data file.

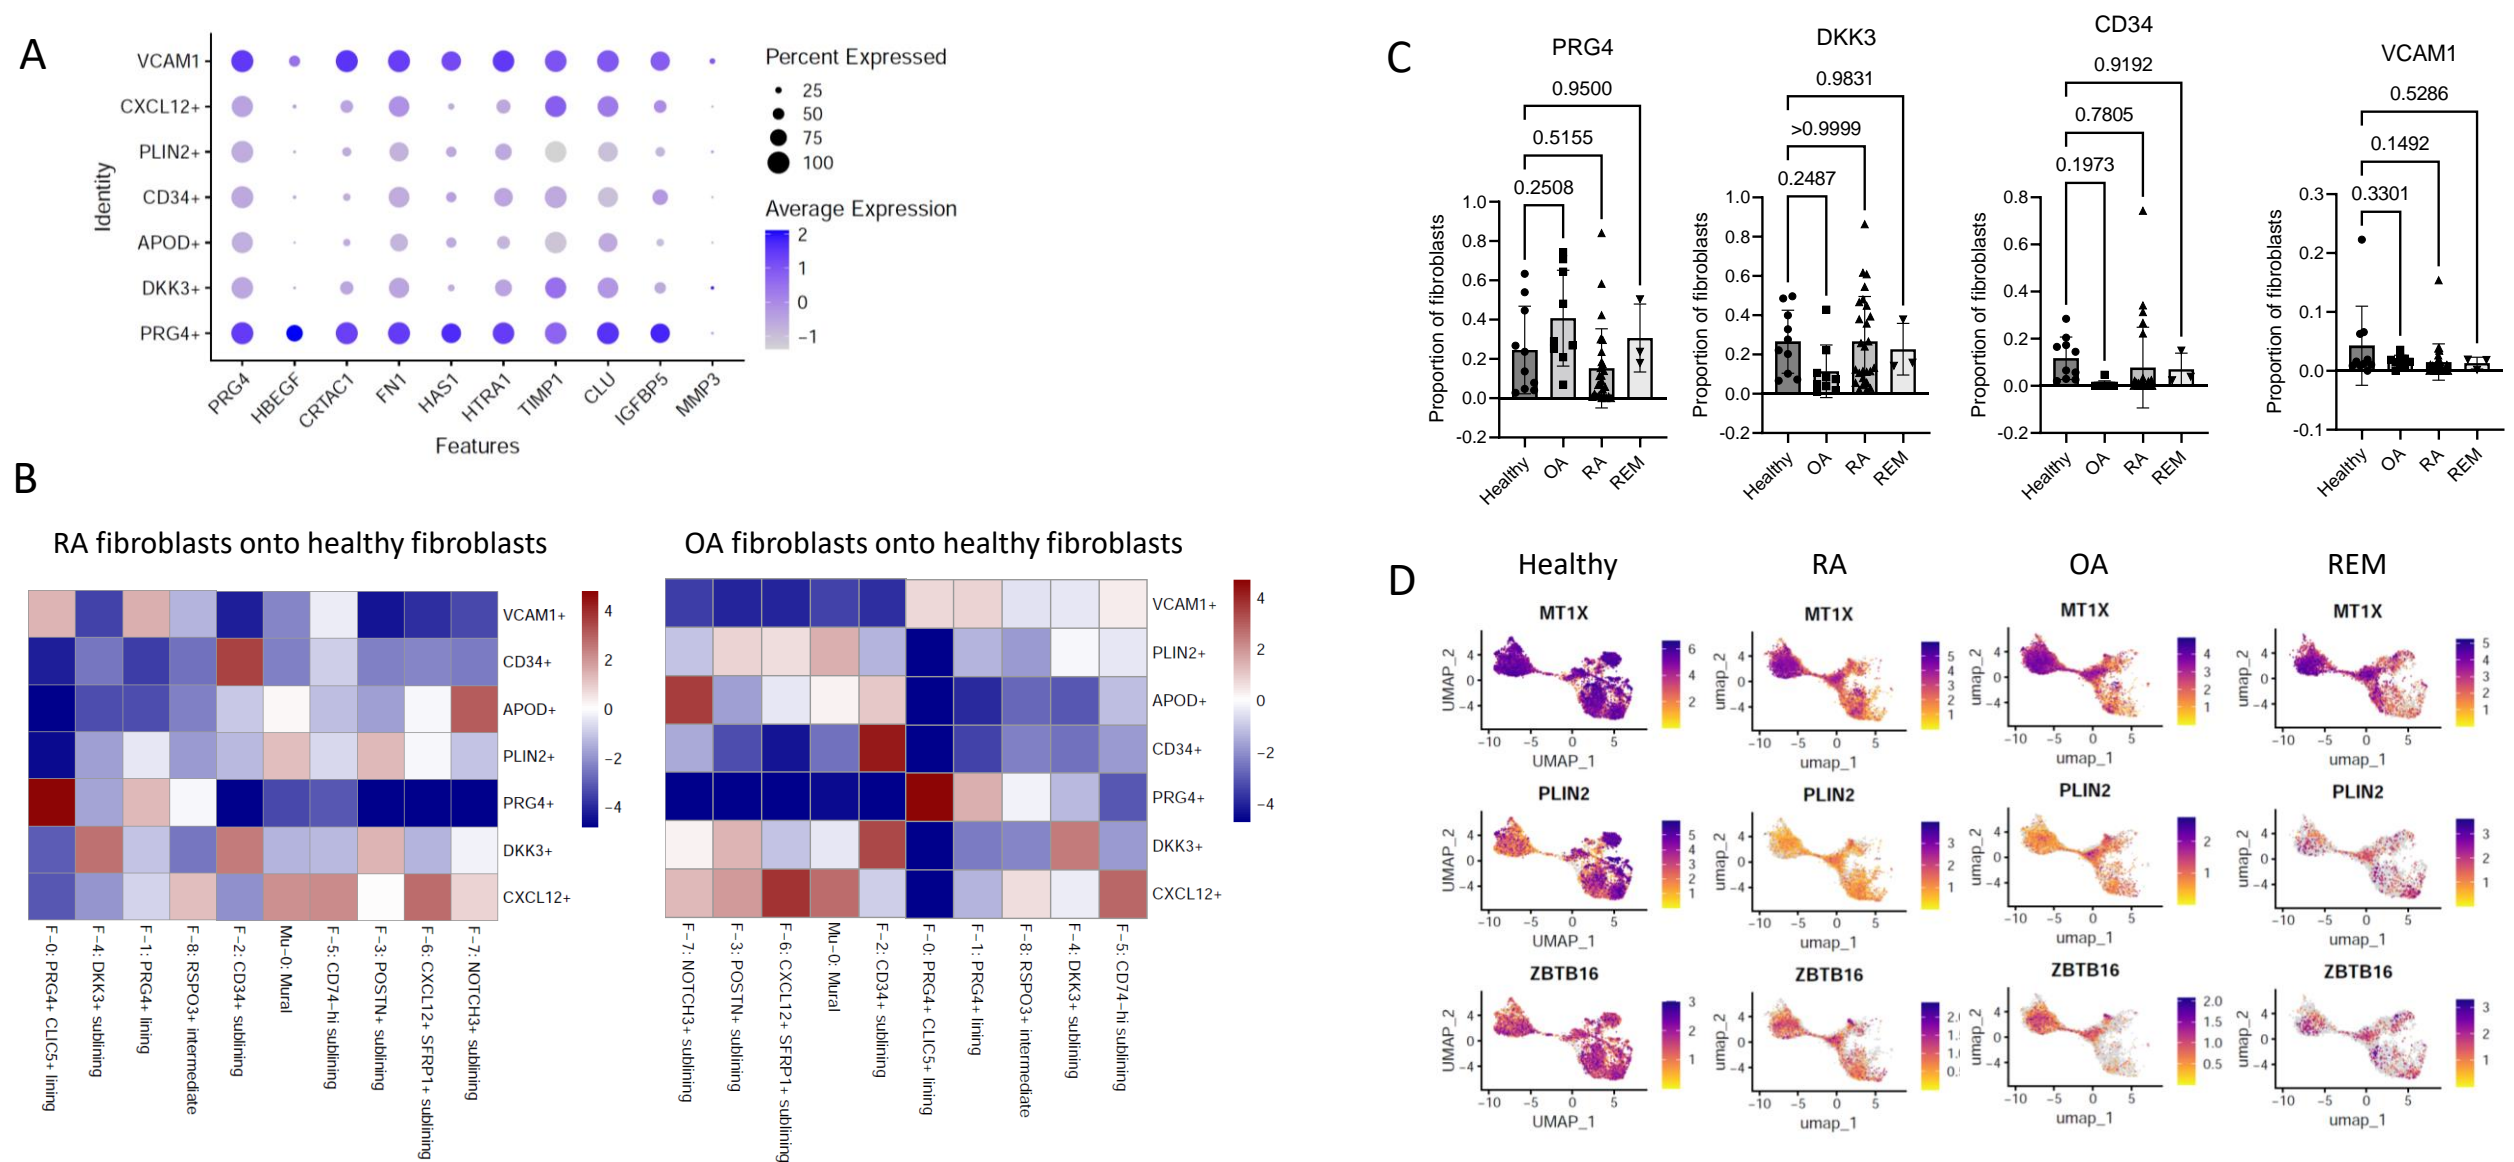

Supplementary Figure 2 S. Fig. 2. A. PRG4+ and VCAM1+ fibroblasts express high levels of lining fibroblast markers. B. Heatmaps show odds ratios for the fibroblast clusters, with rows corresponding to fibroblast clusters from healthy synovial fibroblasts and columns corresponding to fibroblast clusters from Zhang, *et al*, 2022. Blue-red color scale indicates the log(OR) for a given pair of states (OR is the ratio of odds of mapping a cluster in Zhang, *et al*, 2022 onto the same cluster of this study), with higher values indicating greater correspondence. C. Quantification of fibroblast proportions mapping to each cluster. Df=44. PRG4: F=3.383, DKK3: F=1.410, CD34: F=1.099, VCAM1: F=1.351. Healthy n=10, OA n=9, RA n=26, REM n=3 biological samples. P values were calculated using an ordinary one-way ANOVA followed by Dunnett's multiple comparison post-hoc testing. D. Healthy fibroblasts globally upregulate genes which are involved in metabolism, including, *PLIN2*, *MT1X*, and *ZBTB16*. Source data are provided as a Source Data file.



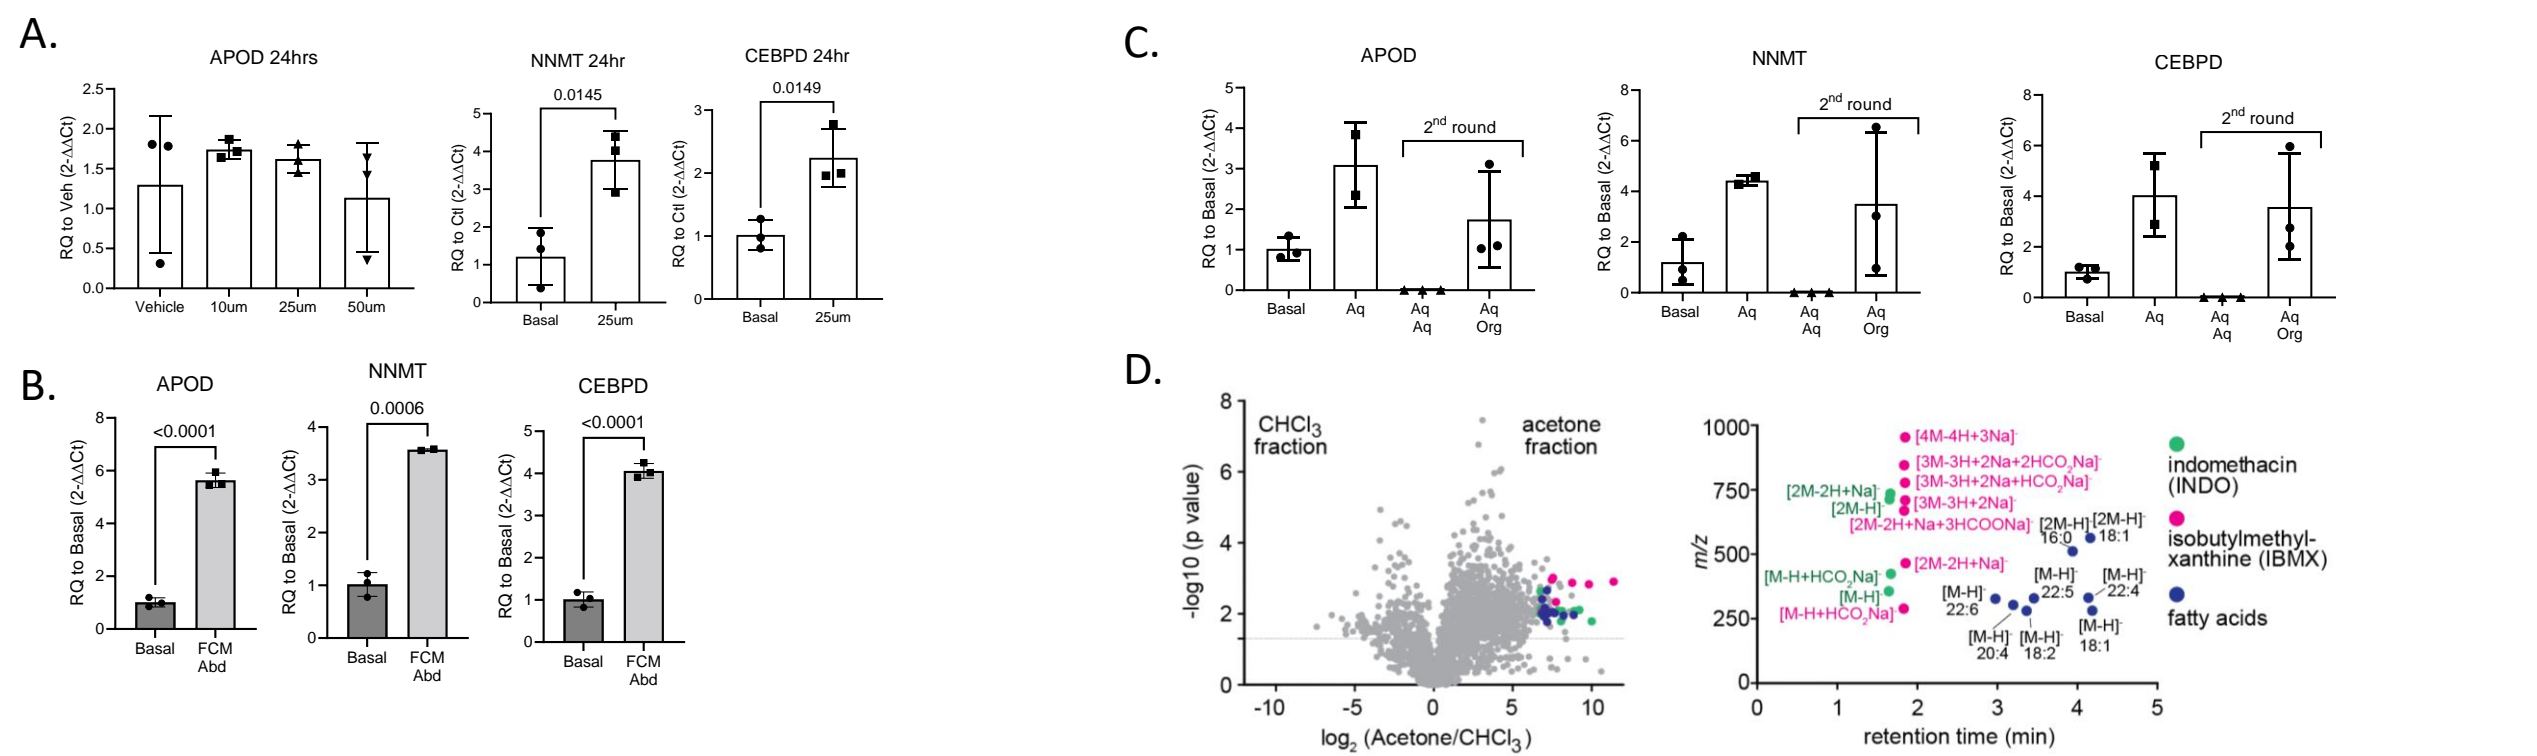

Supplementary Figure 3 A. Fibroblasts cultured with 10um oleate+10um palmitate for 24hrs do not induce *APOD* expression, n=3 technical replicates representative of one independent experiment. B. Abdominally derived FCM induces *APOD*, *NNMT*, and *CEBPD* expression, n=3 technical replicates representative of one independent experiment (*NNMT* FCM n=2). A-B: P values were calculated using a two-tailed student's T test. C. Bligh and dyer separation of adipocyte conditioned media (ACM) shows that the active molecule is in organic and aqueous fractions of ACM (Shown in Fig. 3c). Due to incomplete separation; a second round of bligh and dyer on the aqueous fraction was performed and results in all activity going to the organic fraction ("aq org"). Basal, Aq aq, Aq Org n=3, Aq n=2 technical replicates representative of one independent experiment. D. Three independently separated fractions of chloroform, acetone and methanol were normalized to the lipid weight and subject to HPLC-QToF-MS negative mode analysis. The non-stimulatory chloroform fractions were compared to the stimulatory acetone fractions by lipidomics analysis. The ions with highest fold change and intensity in the acetone fraction were selected and plot against the retention time. The fatty acid class (blue dots of seven different fatty acids), indomethacin (green dots of four alternate and multimer ion adducts), and isobutylmethylxanthine (pink dots of four alternate and multimer ion adducts) were identified. Source data are provided as a Source Data file.

A.

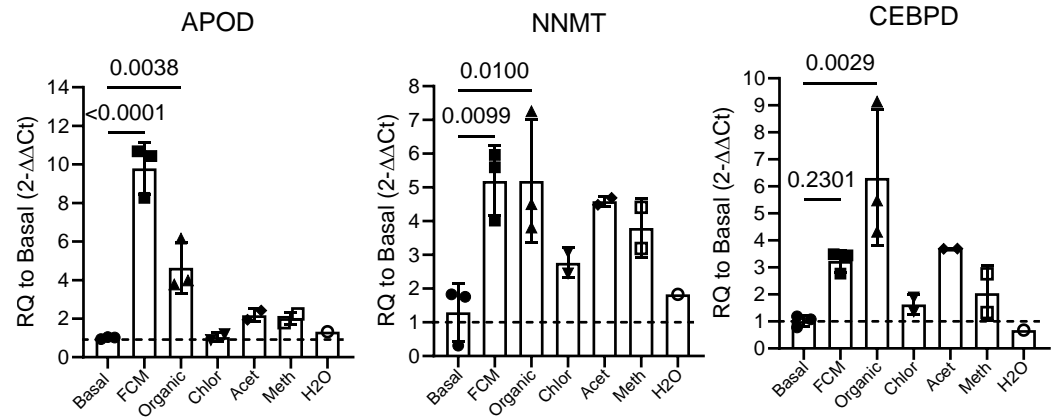

B.

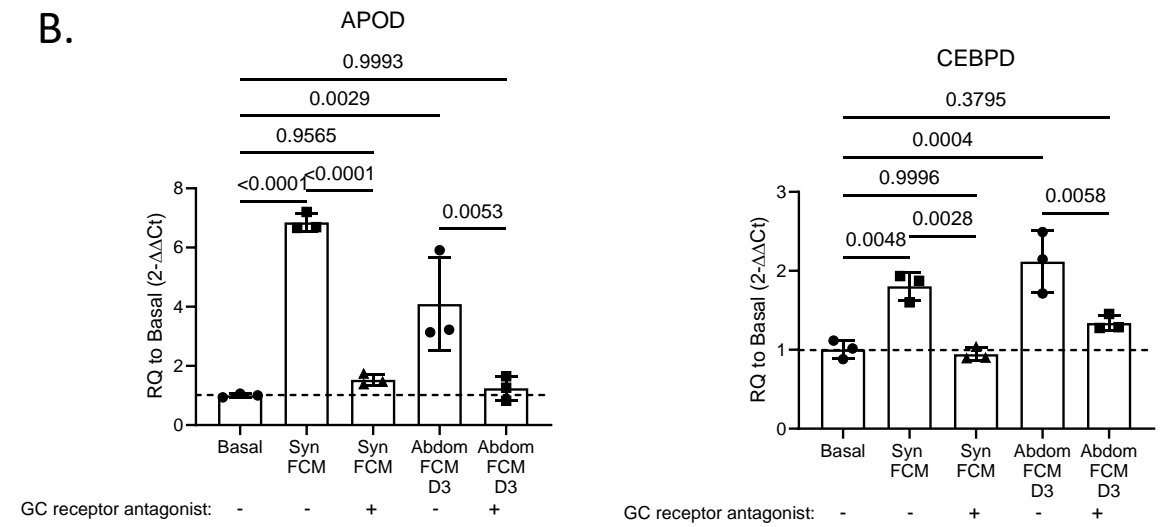

Supplementary Figure 4. A. FCM was separated using the Bligh and Dyer method into aqueous and organic phases. Then, the organic phase was taken for solid phase separation and eluted based on polarity using chloroform, acetone, methanol, and water. Testing activity of each fraction; activity was primarily in the acetone and methanol fractions of the organic phase. Basal, FCM, Organic n=3, Chlor, Acet, Meth n=2, H2O n=1 technical replicates representative of two independent experiments. P values were calculated using an ordinary one-way ANOVA followed by Dunnett's multiple comparison post-hoc testing. B. APOD and CEBPD upregulation are suppressed by the GCR antagonist mifepristone, n=3 technical replicates representative of one independent experiment. D3 stands for donor 3. P values were calculated using an ordinary one-way ANOVA. Source data are provided as a Source Data file.

A.

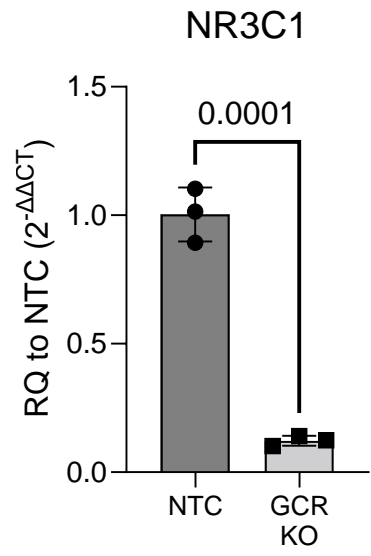

B.

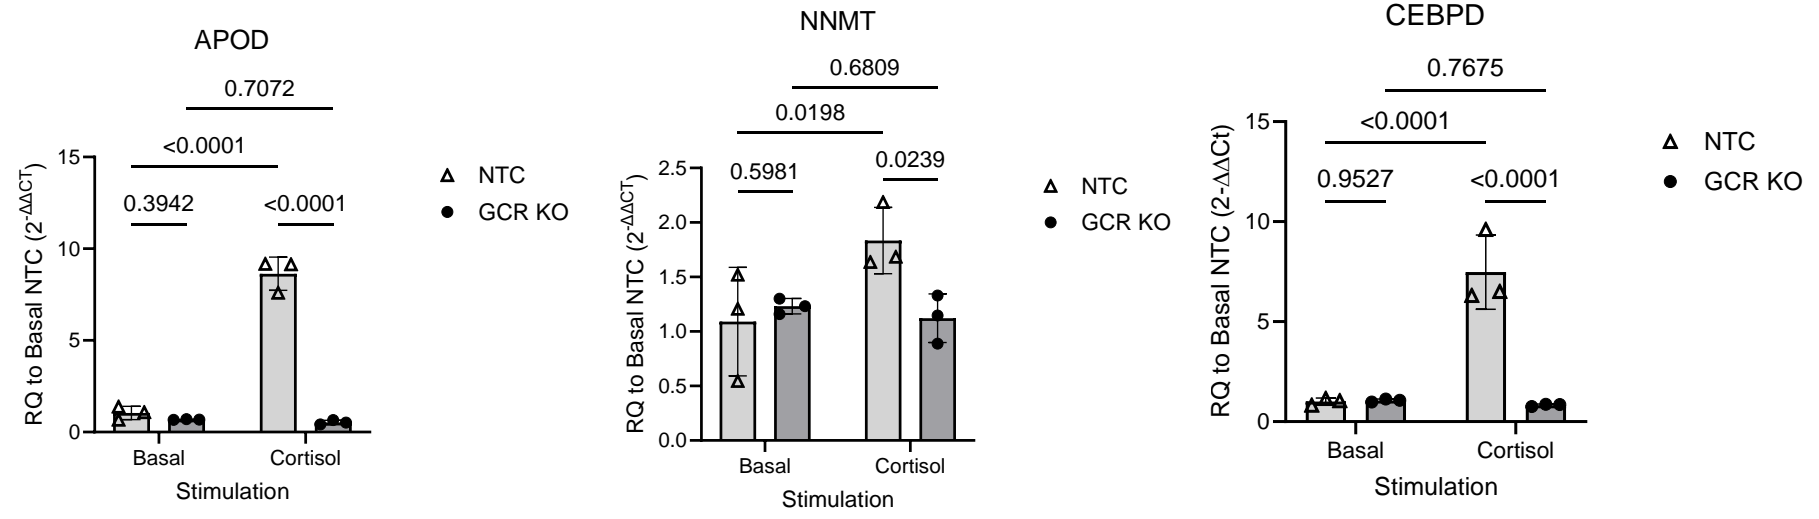

Supplementary Figure 5. A. CRISPR-Cas9 of the glucocorticoid receptor gene, *NR3C1*, results in significant reduction of *NR3C1* gene expression compared to the non-targeting control (NTC), n=3 technical replicates representative of one independent experiment. P values were calculated using a two-tailed student's T test. B. *NR3C1* knockout renders cells unresponsive to cortisol, n=3 technical replicates representative of one independent experiment. P values were calculated using a two way ANOVA with Uncorrected Fisher's LSD. Source data are provided as a Source Data file.

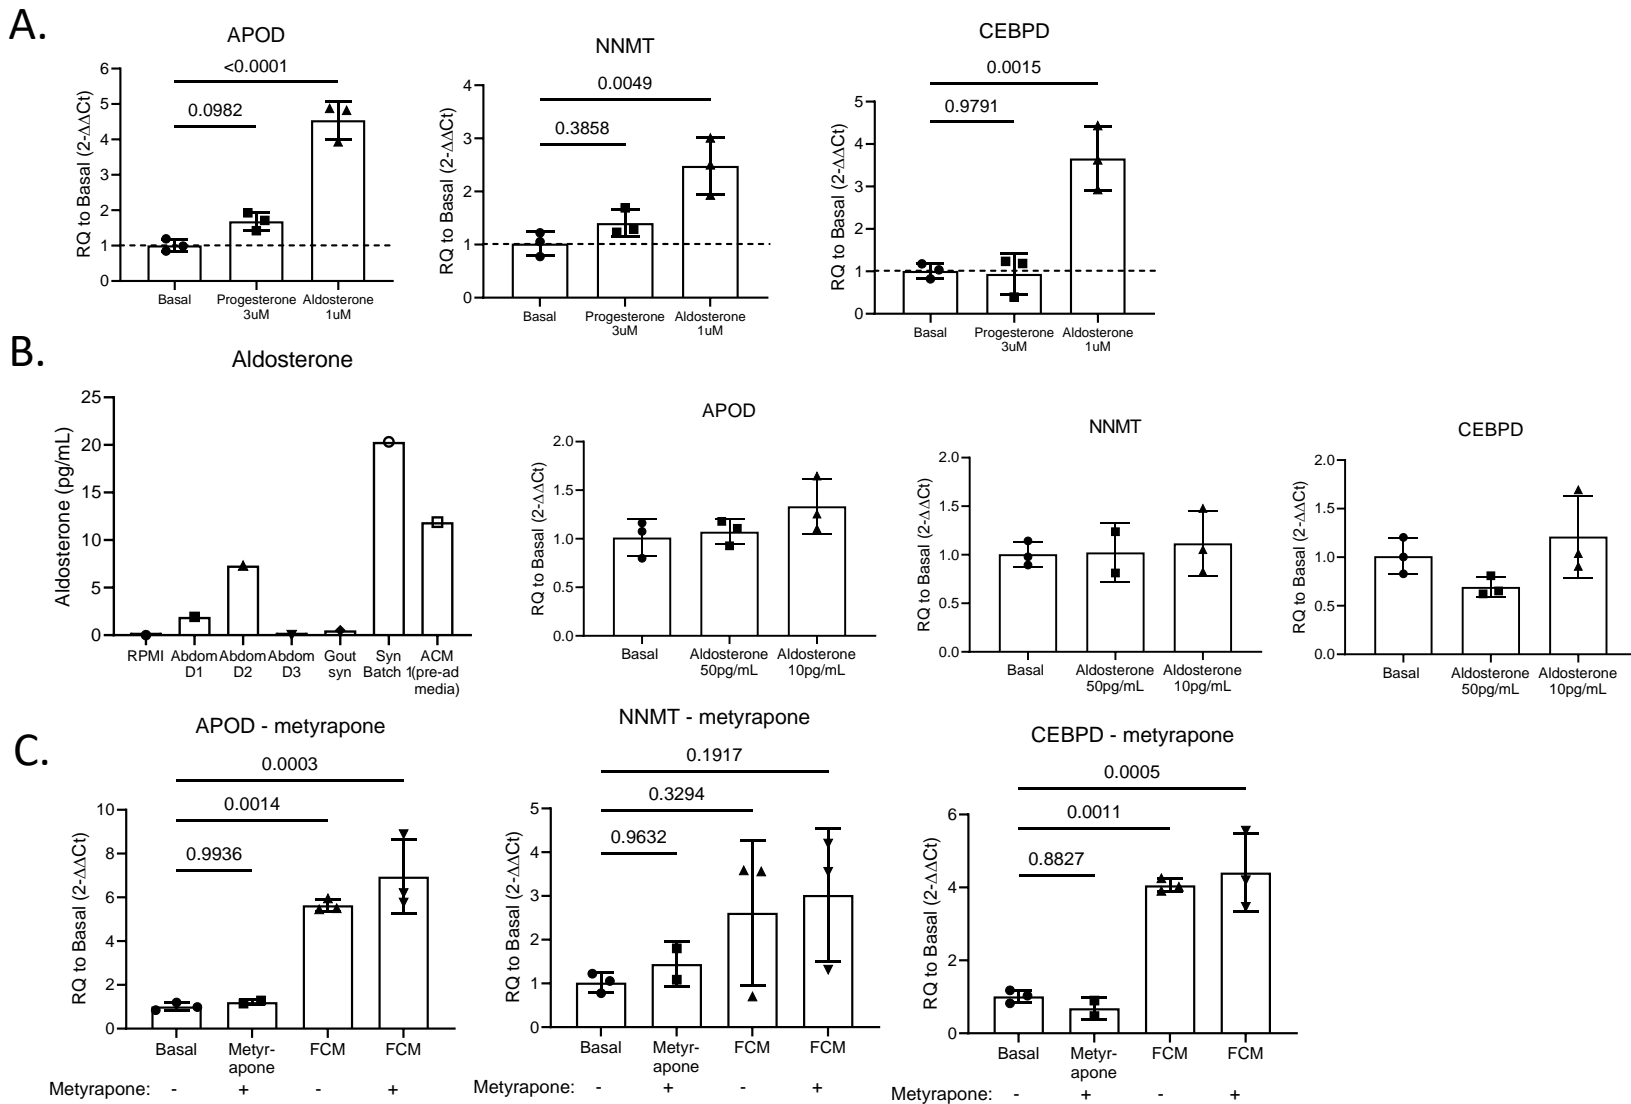

Supplementary Figure 6. A. Progesterone has no activity; aldosterone contains activity at 3 $\mu$ M. n=3 technical replicates representative of one independent experiment. B. Aldosterone levels in FCM as measured by ELISA; n=1 technical replicate per biological sample (6 total). Physiologically relevant levels contain no activity as measured by gene expression of APOD, NNMT, or CEBPD, n=3 technical replicates representative of one independent experiment (NNMT 50pg/mL aldosterone n=2). C. Blocking Hydroxysteroid 11-Beta Dehydrogenase 1 conversion of cortisone to cortisol with metyrapone does not block FCM activity, Basal, FCM, FCM+metyrapone n=3, Metyrapone n=2 technical replicates representative of one independent experiment. A, C: P values were calculated using an ordinary one-way ANOVA followed by Dunnett's multiple comparison post-hoc testing. Source data are provided as a Source Data file.

A.

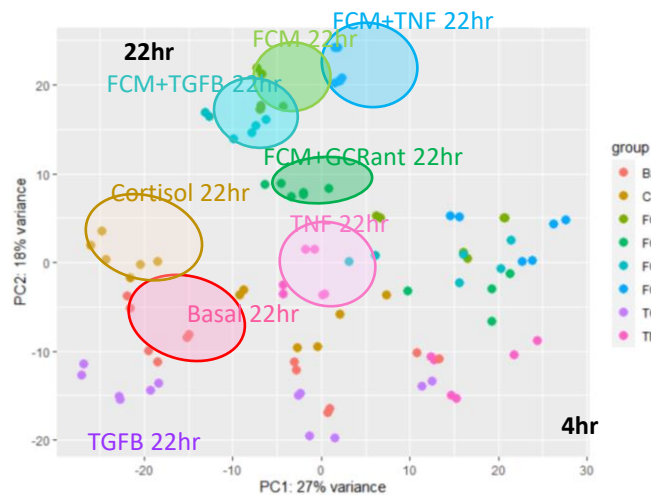

B.

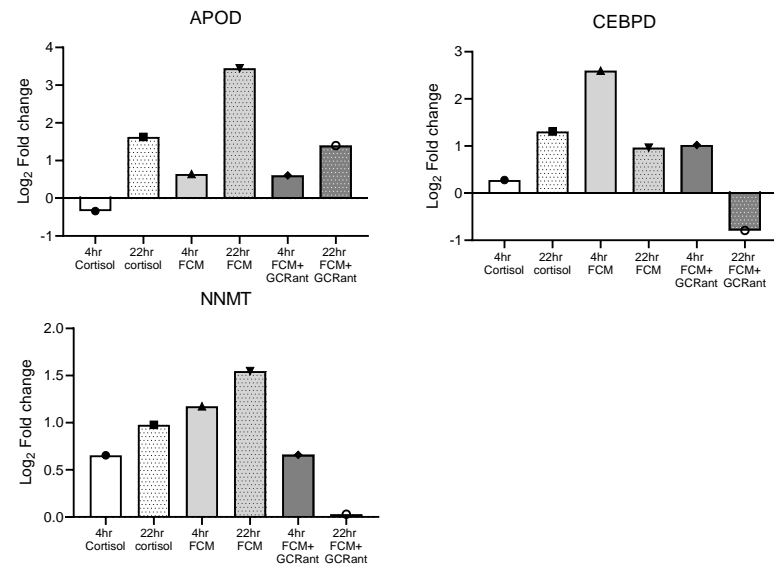

C.

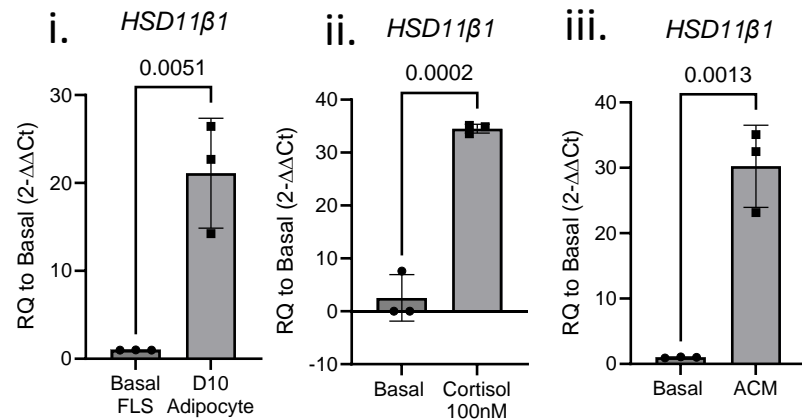

D.

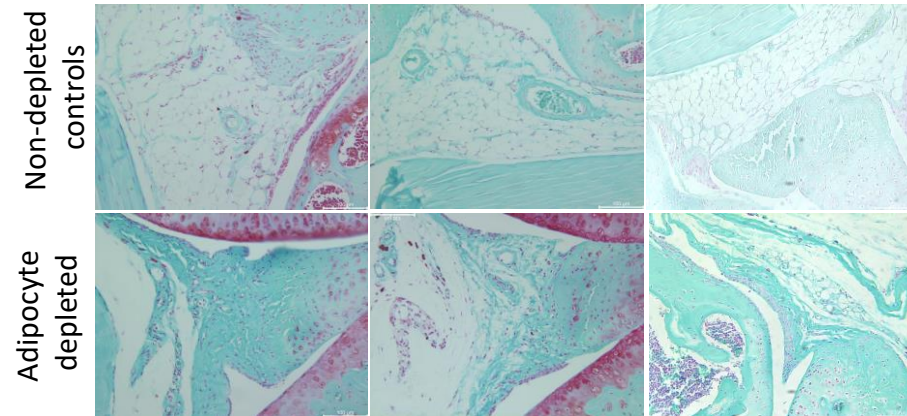

Supplementary Figure 7. A. PCA of bulk RNA sequencing samples. B. Plotting of bulk RNAseq individual gene expression of APOD, CEBPD, and NNMT. C. *HSD11B1* gene expression. i. We differentiated preadipocytes into mature adipocytes for 10 days, then isolated RNA and performed qPCR analysis for *HSD11B1*. We also isolated RNA from a cultured synovial RA fibroblast cells line and found that cultured adipocytes express *HSD11B1* at >20-fold higher levels than synovial fibroblasts. ii. We stimulated synovial fibroblasts with cortisol or iii. adipocyte conditioned media (ACM) and found that both stimulated fibroblasts substantially upregulate their expression of *HSD11B1* (~30-fold). This suggests that at baseline, adipocytes are a major source of *HSD11B1*, but expression can be induced in other cell types via cortisol and adipocyte products. n=3 technical replicates representative of one independent experiment. P values were calculated using a two-tailed student's T test. D. Source images for adipocyte quantification in figure 5a, n=3 biological replicates representative of one independent experiment. Source data are provided as a Source Data file.

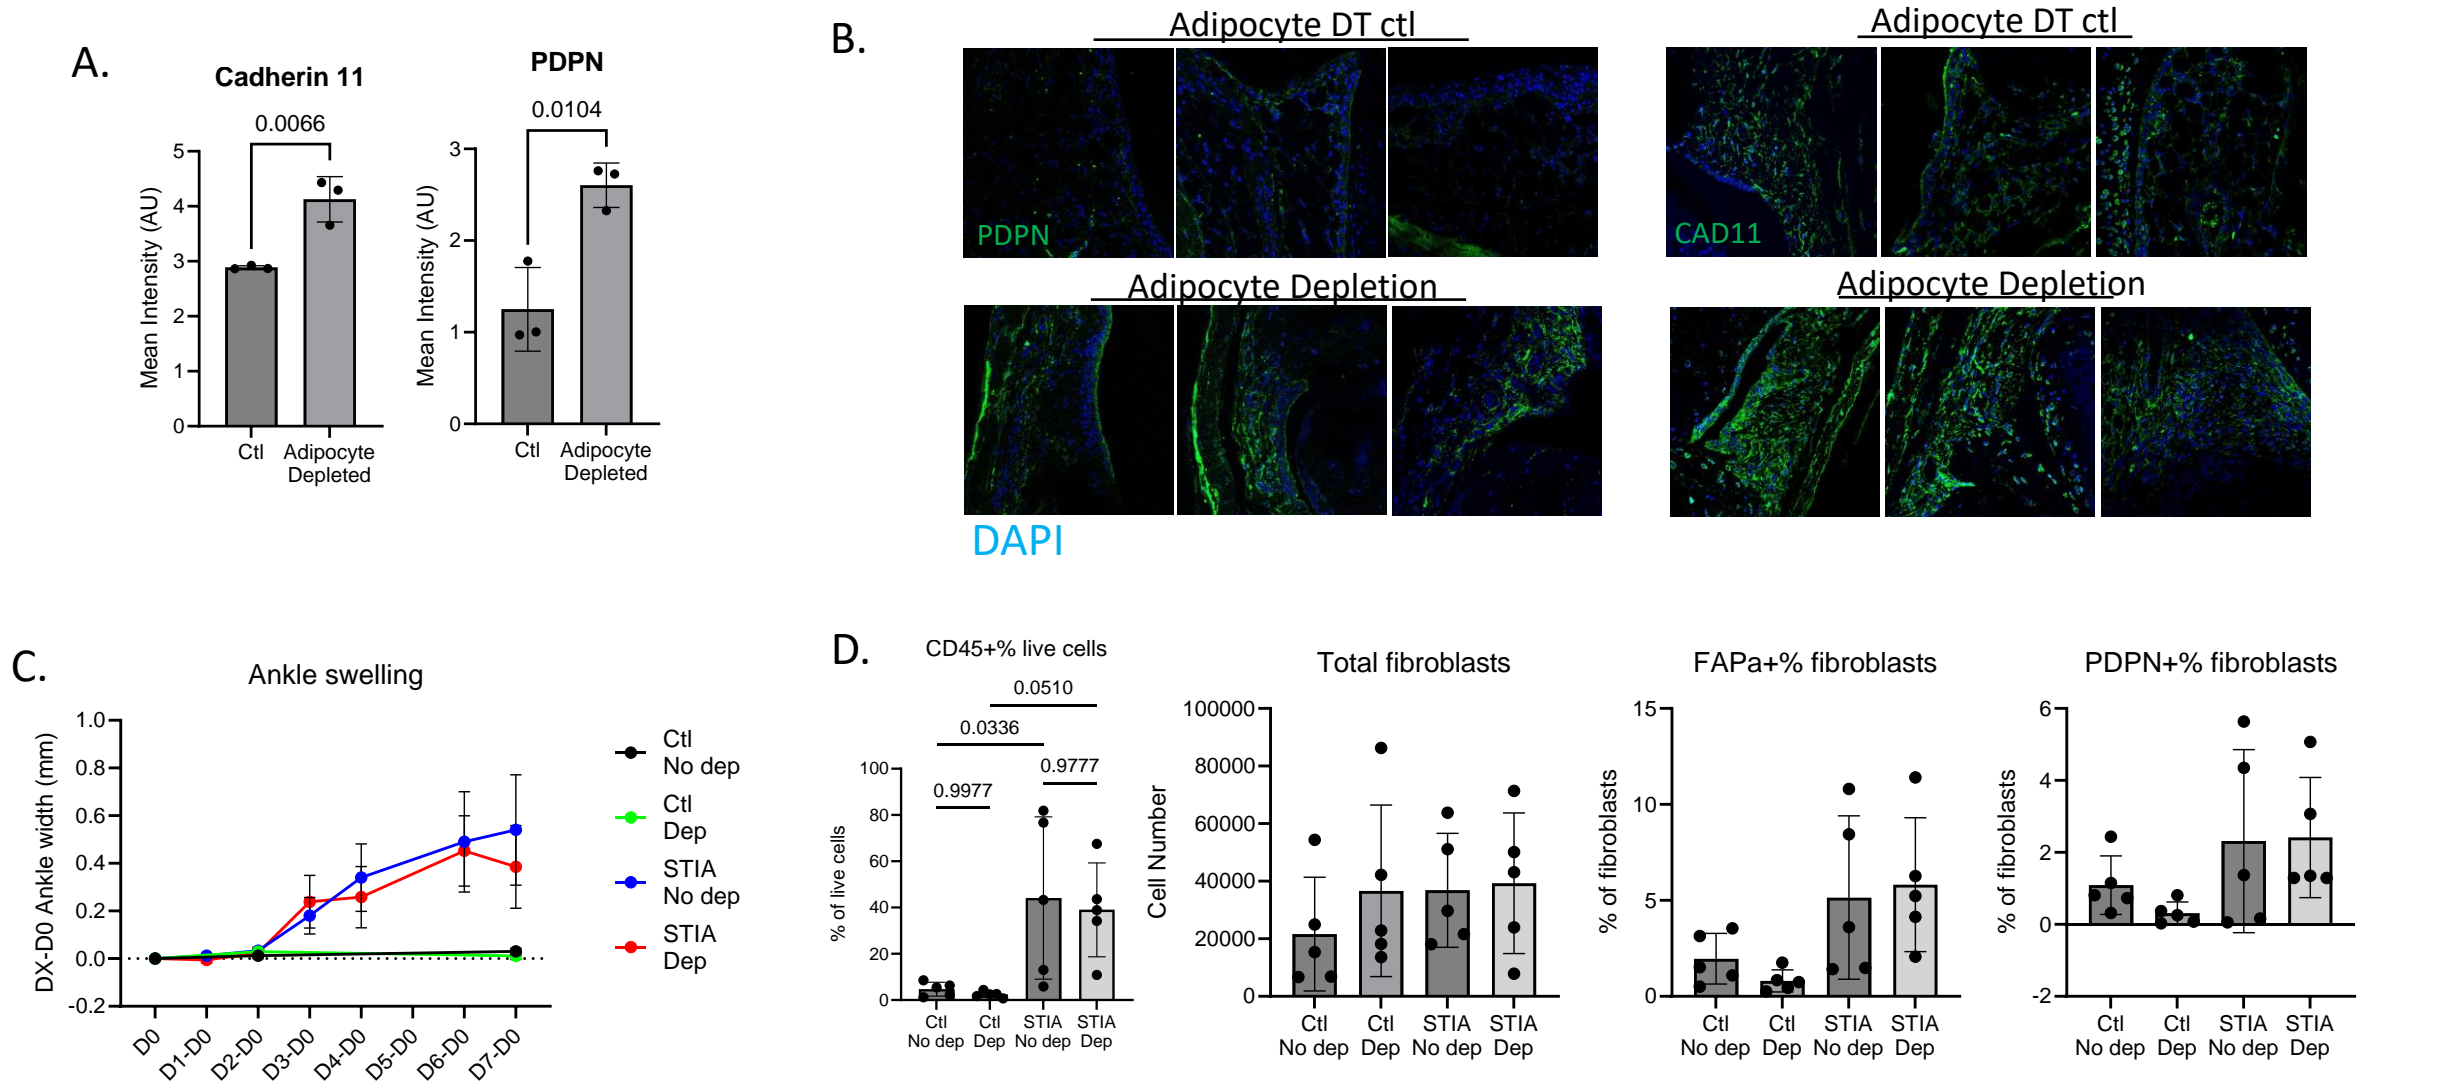

Supplementary figure 8. Adipocyte depletion in naïve mice and in the K/BxN serum transfer inflammatory arthritis (STIA) model. **A.** Mean fluorescence intensity of cadherin-11 and PDPN immunostaining in PDGFRA<sup>+</sup> cells in naïve knee joints with or without 8 weeks of adipocyte depletion. Ctl= diphtheria toxin injected genotype controls, n=3 biological replicates representative of one independent experiment. P values were calculated using a two-tailed student's T test. **B.** Images used for quantification in D. **C-D:** Mouse ankles were depleted 2 weeks prior to STIA induction. **C.** Measures of ankle swelling by caliper, n= 10 biological replicates representative of one independent experiment. **D.** Flow cytometry performed on ankle synovial tissue quantifying immune cells (CD45<sup>+</sup>) and fibroblasts (CD45<sup>-</sup>, CD146<sup>-</sup>, CD31<sup>-</sup>), n= 5 biological replicates representative of one independent experiment. P values were calculated using an ordinary one-way ANOVA followed by Tukey's multiple comparison post-hoc testing. Source data are provided as a Source Data file.



Supplementary Figure 9. Analysis of healthy steroid users and non-users. A. Synovial cells from all healthy steroid users and non-users, OA, and naïve RA donors were harmonized and clustered into a single UMAP. B. UMAP projection from (A) colored by correlation with arthritis (orange) or health (purple) using covarying neighborhood analysis (CNA). C. Cell cluster proportions among healthy, OA, and naïve RA synovial cells and UMAP separated by disease state, healthy n=10, OA n=9, RA n=28. D. Fine clustering analysis on healthy synovial fibroblasts defines 8 distinct clusters. E. Heatmap of the top 10 DEGs per cluster. F. Symphony mapping of OA, naïve RA, and remission fibroblasts to healthy synovial fibroblast reference. G. Quantification of fibroblast proportions mapping to each cluster, healthy n=10, OA n=9, RA n=26, REM n=3. H. Healthy synovium is enriched in APOD, CEBPD, and NNMT expression compared to OA and RA fibroblasts, and is partially restored in remission fibroblasts. I. Application of bulk-RNA sequencing defined module scoring to single cell pseudobulk data (reads collapsed over patient) reveals that FCM and cortisol activation is similar in fibroblasts from healthy steroid users and non-users, non-reported n=10, reported n=6. P values were calculated using a two-tailed student's T test. C, G: P values were calculated using an ordinary one-way ANOVA followed by Tukey's multiple comparison post-hoc testing. Source data are provided as a Source Data file.



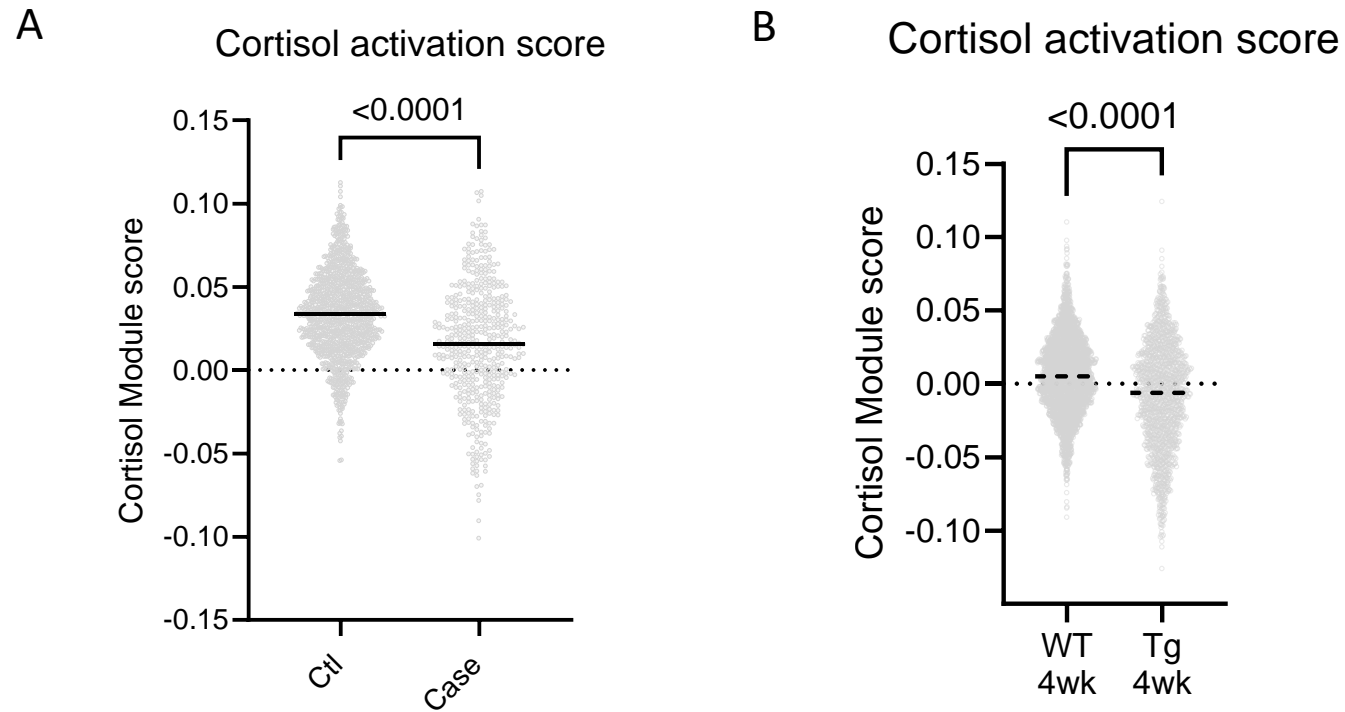

Supplementary Figure 10. A. Cortisol activation score, as defined by bulk RNA sequencing, was applied to wildtype mouse synovial sublining fibroblasts from Wei et. al.. Ctl= healthy (n=1,138 cells), case=serum transfer arthritis (n=493 cells), day 10. B. The cortisol activation score was applied to synovial fibroblasts from the Armaka et. al. WT 4wk= healthy (n=2,852 cells), Tg 4wk= hTNFtg spontaneous arthritis mice (n=1,553 cells). A-B: P values were calculated using a two-tailed student's T test. Source data are provided as a Source Data file.

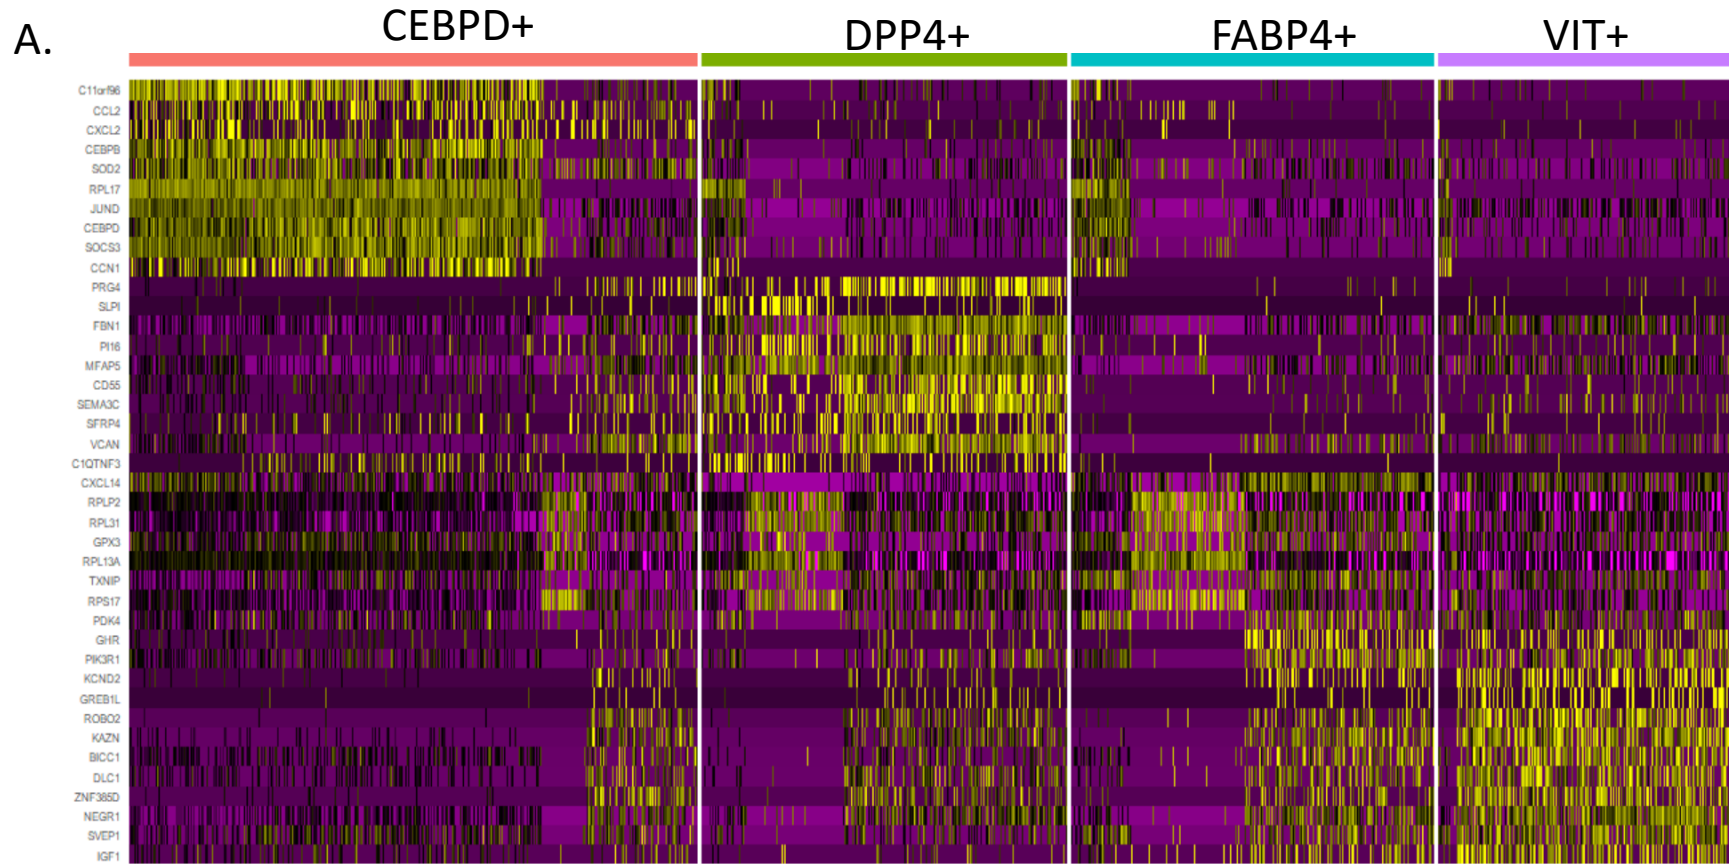

Supplementary Figure 11. A. Top ten markers of PDGFR $\alpha$ + non mesothelial cells from VAT (visceral) and SAT (subcutaneous) adipose tissue.

**A.** Hallmark pathways, FABP4 PreAd

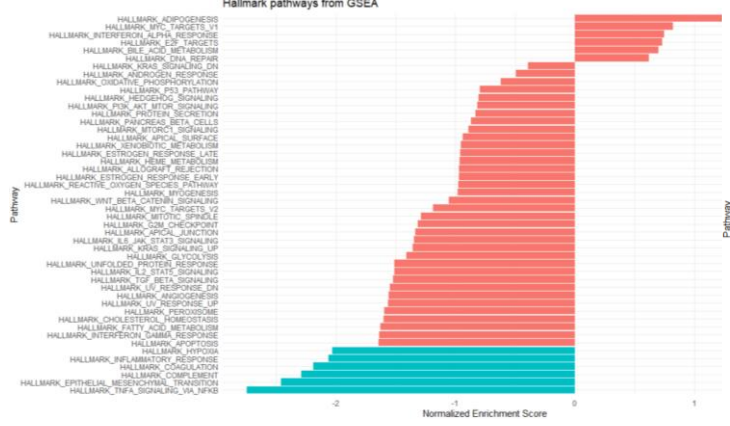

Hallmark pathways, CEBPD PreAd

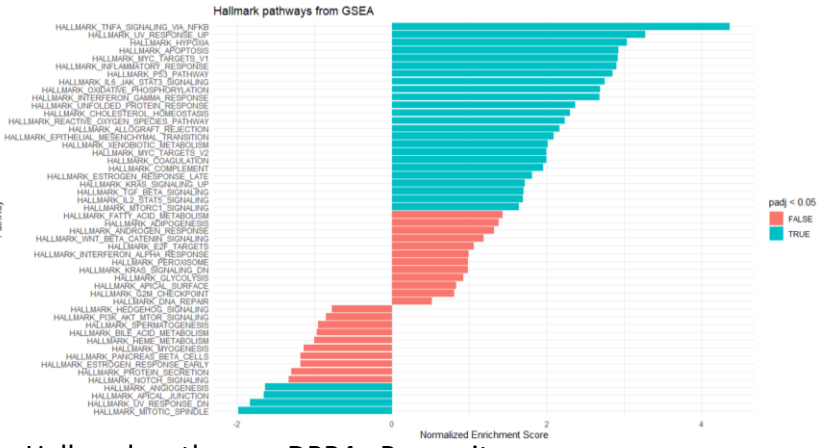

**B.** Adipose tissue

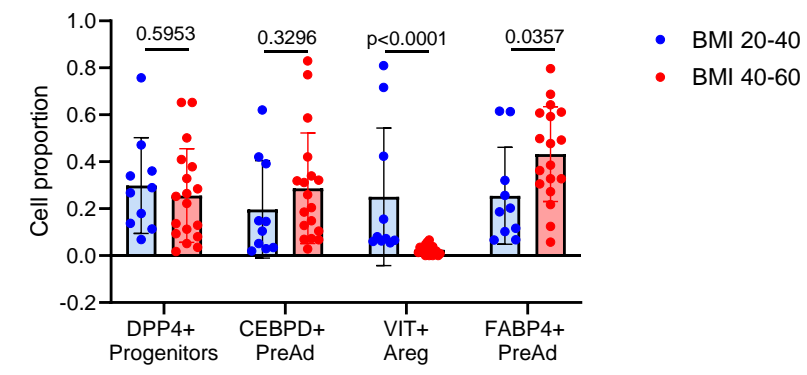

Hallmark pathways, VIT+ Aregs

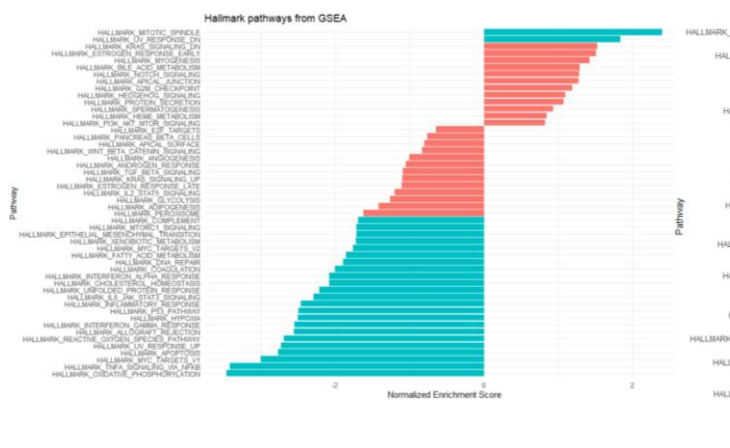

Hallmark pathways, DPP4+ Progenitors

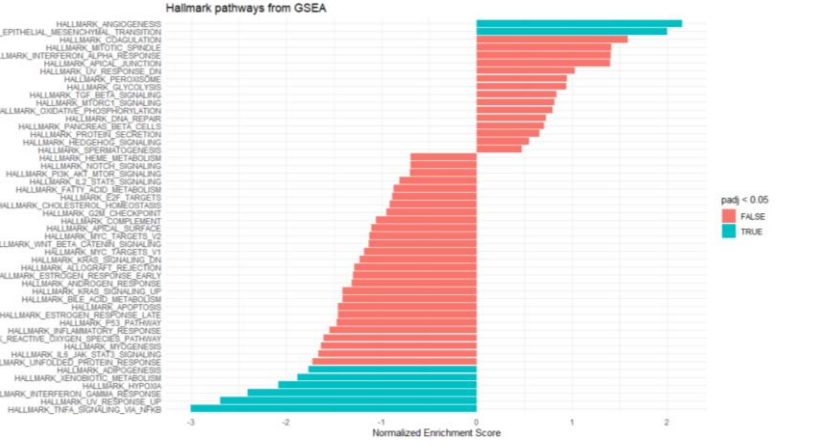

Supplementary Figure 12. A. FGSEA on adipose populations using Hallmark Pathways. B. Adipose stromal population proportions by BMI, BMI 20-40 n=10, BMI 40-60 n=18. P values were calculated using a two-tailed student's T test. Source data are provided as a Source Data file.

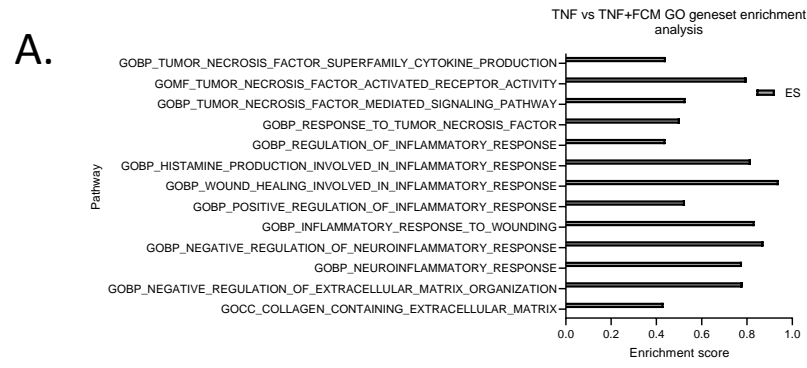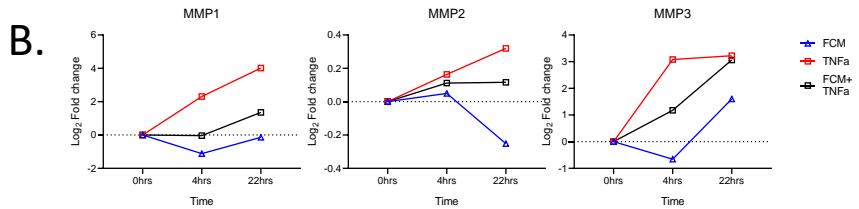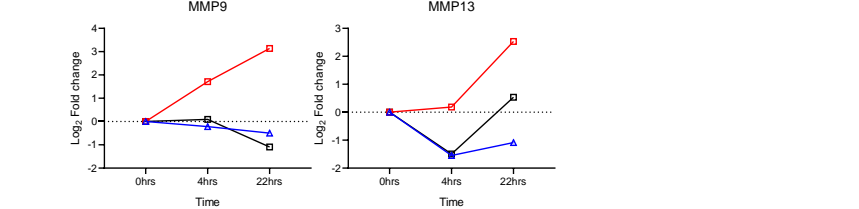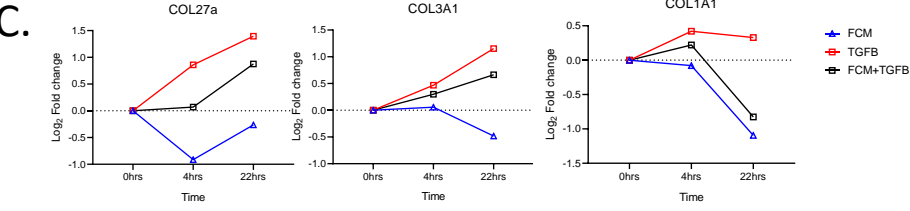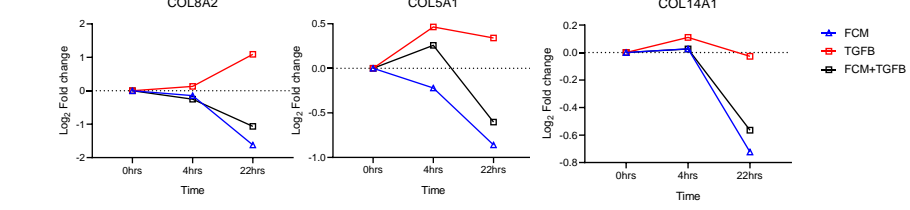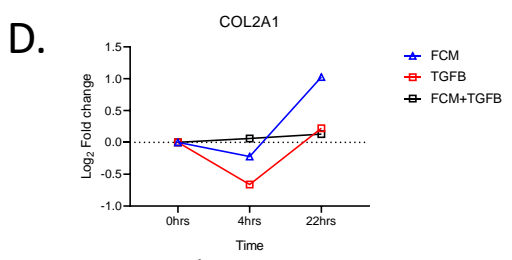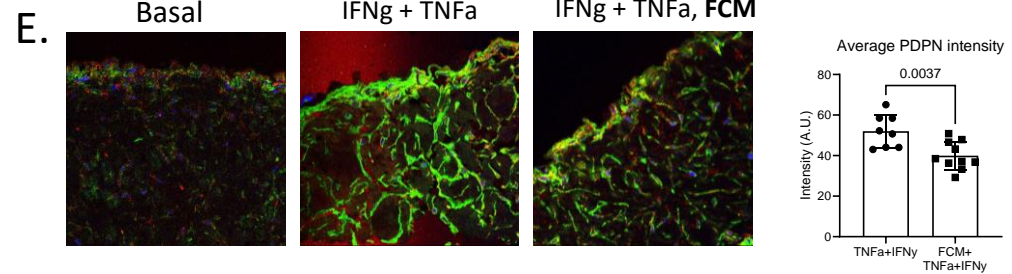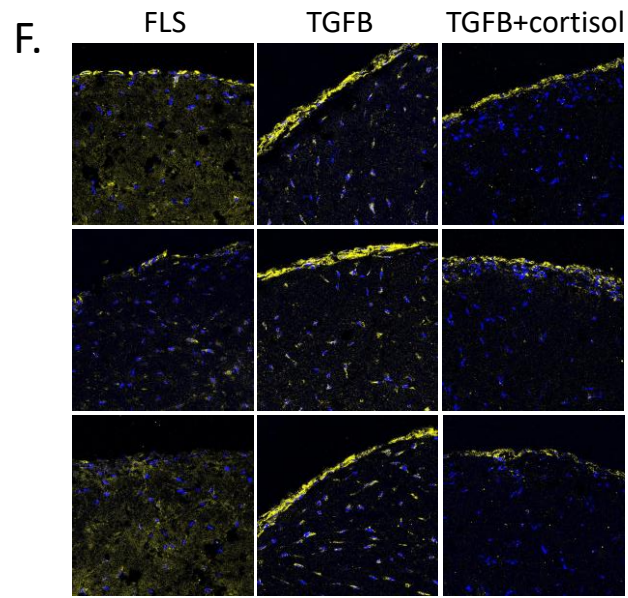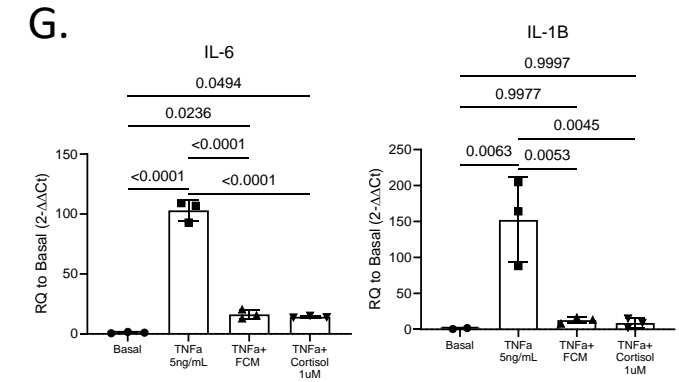

Supplementary Figure 13

Supplementary Figure 13. A. GSEA analysis using GO terms on bulk RNA sequencing data. Enriched pathways are “rescued” by FCM to basal levels. B. FCM reduces MMP upregulation by TNF $\alpha$ . C. FCM rescues fibrotic collagens upregulated by TGF $\beta$ . D. FCM does not impact non-fibrotic collagens. E. PDPN staining of micromass sections and intensity quantification performed in ImageJ, n=4 biological replicates and 2 technical replicates (8 total replicates) representative of one independent experiment. P values were calculated using a two-tailed student’s T test. F. Cortisol (1 $\mu$ M) prevents TGF $\beta$  (10ng/mL) induced fibrosis as measured by collagen 1 $\alpha$ 1 immunostaining (Day 21), n=3 biological replicates representative of one independent experiment. G. FCM and cortisol inhibit TNF $\alpha$  induced pro-inflammatory changes, n=3 technical replicates representative of one independent experiment. P values were calculated using an ordinary one-way ANOVA followed by Sidak’s multiple comparison post-hoc testing. Source data are provided as a Source Data file.

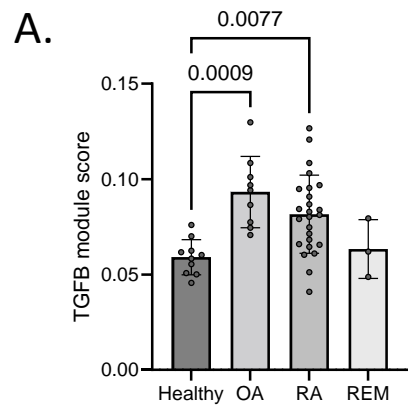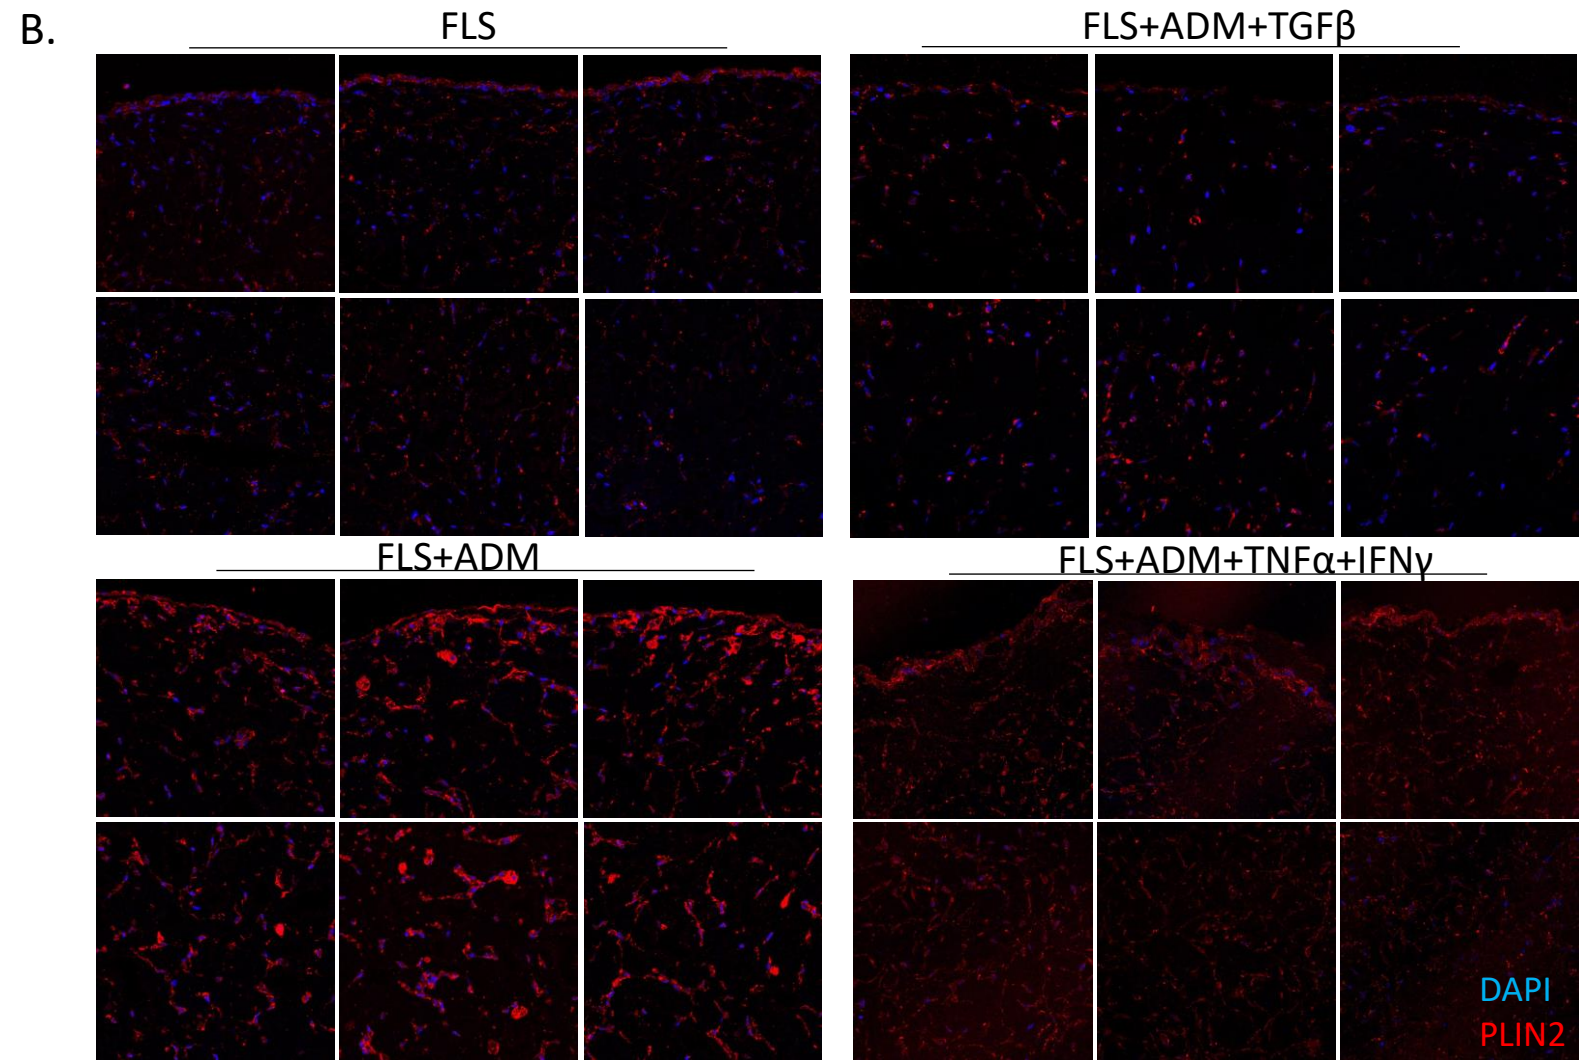

Supplementary Figure 14. A. Bulk-RNA sequencing defined TGFB activation score was applied to a pseudobulk analysis of single cell RNA sequenced synovial fibroblasts, healthy n=10, OA n=9, RA n=26, REM n=3 biological samples. P values were calculated using a Kruskal-Wallis test. B. Images used for quantification of Plin2 expression in figure 7e, n=3 biological replicates and 2 technical replicates (6 total replicates) representative of one independent experiment. Source data are provided as a Source Data file.

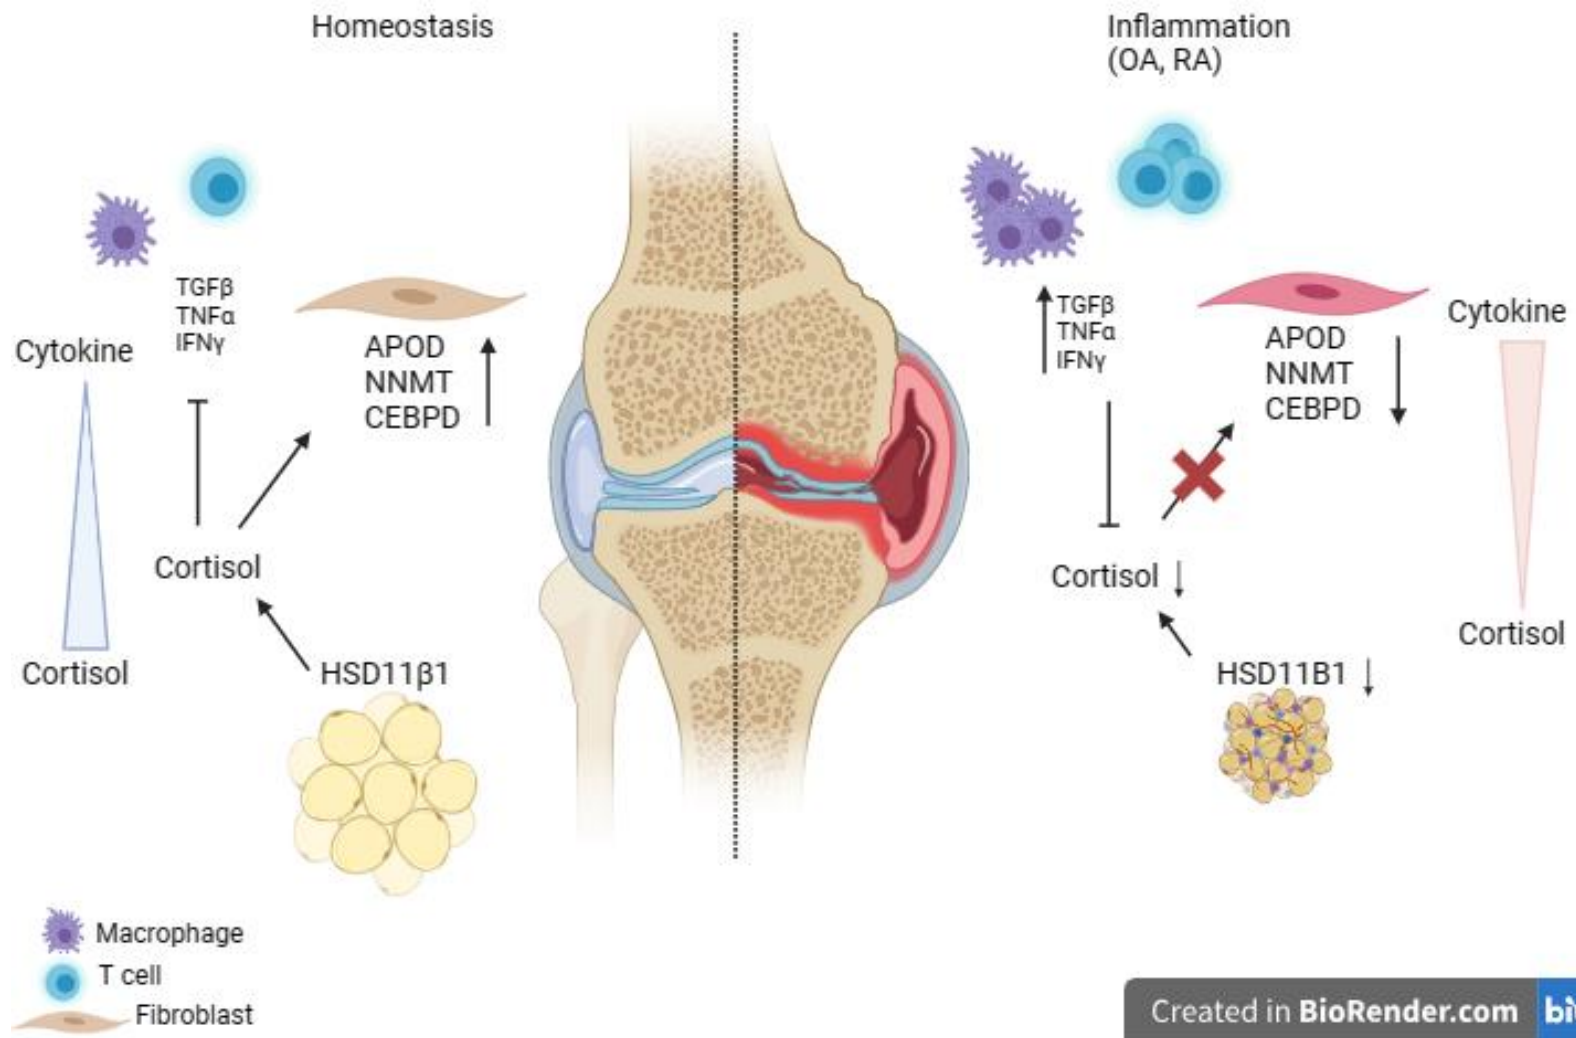

Supplementary Figure 15. A graphic summary of the findings of the paper. Supplementary figure 15 Created with BioRender.com released under a Creative Commons Attribution-NonCommercial-NoDerivs 4.0 International license (<https://creativecommons.org/licenses/by-nc-nd/4.0/deed.en>).





University of Alabama at Birmingham, Birmingham, AL, USA. <sup>30</sup>Laboratory for Human Immunogenetics, RIKEN Center for Integrative Medical Sciences, Yokohama, Japan. <sup>31</sup>Centre for Experimental Medicine and Rheumatology, EULAR Centre of Excellence, William Harvey Research Institute, Queen Mary University of London, London, UK. <sup>32</sup>Barts Health NHS Trust, Barts Biomedical Research Centre (BRC), National Institute for Health and Care Research (NIHR), London, UK. <sup>33</sup>Division of Rheumatology, Department of Medicine, The Feinberg School of Medicine, Northwestern University, Chicago, IL, USA. <sup>34</sup>Department of Biostatistics and Computational Biology, University of Rochester School of Medicine and Dentistry, Rochester, NY, USA. <sup>35</sup>Division of Rheumatology and Clinical Immunology, University of Pittsburgh School of Medicine, Pittsburgh, PA, USA. <sup>36</sup>Department of Biomedical Sciences, Humanitas University and Humanitas Research Hospital, Milan, Italy. <sup>37</sup>Division of Immunology and Rheumatology, Institute for Immunity, Transplantation and Infection, Stanford University School of Medicine, Stanford, CA, USA. <sup>38</sup>Department of Radiology, University of Pittsburgh Medical Center, Pittsburgh, PA, USA. <sup>39</sup>Rockefeller University, New York, NY 10065, USA.
